# Supplementary material
Source: PubMed Central journal article supplement (PMC5849518)
Supplement: NIHMS936031-supplement-Final_Supplement_12_15.pdf [file NIHMS936031-supplement-Final_Supplement_12_15.pdf]

**SUPPLEMENTAL MATERIAL**

| Top Heritable SNPs | Protein Characteristics |            | FHS Discovery Cohort                                                     |                 | Prior Chromosomal Position and Tissue Expression Data |                                                                                                                                                            |               |              |                             |                 |
|--------------------|-------------------------|------------|--------------------------------------------------------------------------|-----------------|-------------------------------------------------------|------------------------------------------------------------------------------------------------------------------------------------------------------------|---------------|--------------|-----------------------------|-----------------|
|                    | SNP ID                  | SOMAmer ID | SOMAmer Target Protein                                                   | P-Value         | Estimated Heritability ( $h^2$ )                      | Predicted Location                                                                                                                                         | eQTL Gene     | eQTL P-Value | eQTL Tissue                 | eQTL Consortium |
| rs740750           | 3459-49                 |            | Platelet derived growth factor receptor beta (PDGFRB)                    | <b>3.0E-300</b> | 65.6%                                                 | PDGFRB intron.                                                                                                                                             | <b>PDGFRB</b> | 8.5E-29      | Blood                       | MuTHER          |
| rs6787861          | 2630-12                 |            | Interleukin 1 Receptor accessory protein (IL1RAP)                        | <b>1.8E-162</b> | 46.8%                                                 | IL1RAP intron.                                                                                                                                             | <b>IL1RAP</b> | 6.9E-06      | Transformed Fibroblasts     | GTEEx           |
| rs11653614         | 4435-66                 |            | Ectonucleotide pyrophosphatase/phosphodiesterase family member 7 (ENPP7) | <b>1.8E-107</b> | 38.4%                                                 | ENPP7 intron. rs8074547 ( $r^2 = 0.94$ ) results in predicted pro:leu missense mutation in N-terminal signal sequence                                      | <b>ENPP7</b>  | 7.3E-10      | EBV transformed lymphocytes | GTEEx           |
| rs2519093          | 3470-1                  |            | E Selectin (SELE)                                                        | <b>1.6E-82</b>  | 31.7%                                                 | Different chromosome than SELE.                                                                                                                            | NA            | NA           | NA                          | NA              |
| rs11582423         | 3366-51                 |            | Extracellular matrix protein 1 (ECM1)                                    | <b>2.0E-76</b>  | 30.0%                                                 | ECM1 intron. rs3737240 ( $r^2 = 0.95$ ) results in predicted thr:met missense mutation in ECM1. Rs13294 ( $r^2 = 0.99$ ) also results in predicted gly:ser | NA            | NA           | NA                          | NA              |
| rs704              | 3839-60                 |            | AH receptor interacting protein (AIP)                                    | <b>6.3E-65</b>  | 27.0%                                                 | Different chromosome than AIP.                                                                                                                             | NA            | NA           | NA                          | NA              |
| rs3869574          | 2687-2                  |            | Melanoma derived growth regulatory protein (MIA)                         | <b>5.2E-60</b>  | 25.9%                                                 | MIA intron. rs2230694 ( $r^2 = 1.0$ ) results in predicted synonymous mutation in MIA.                                                                     | <b>MIA</b>    | 5.0E-12      | Nerve                       | GTEEx           |
| rs10445391         | 4913-78                 |            | C C motif chemokine 16 (CCL16)                                           | <b>2.5E-67</b>  | 25.6%                                                 | CCL16 intron.                                                                                                                                              | NA            | NA           | NA                          | NA              |
| rs2041740          | 3446-7                  |            | Interleukin 18 receptor 1 (IL18R1)                                       | <b>1.8E-57</b>  | 24.9%                                                 | IL18R1 intron.                                                                                                                                             | <b>IL18R1</b> | 9.6E-10      | Burn exposed skin           | GTEEx           |
| rs35647509         | 4559-64                 |            | Kynureninase (KYNU)                                                      | <b>2.8E-50</b>  | 22.4%                                                 | KYNU intron. rs9013 ( $r^2 = 0.86$ ) results in predicted lys:glu missense mutation in KYNU.                                                               | NA            | NA           | NA                          | NA              |

**Supplemental Table 1. Chromosomal position and tissue expression data for the top ten SNPs explaining heritability.** Characteristics of the genomic location and selected prior expression data (if available) for the top ten SNPs with the highest estimated heritability ( $h^2$ ). HaploReg v4.1 (Broad Institute, Boston, USA) was used to annotate genomic location prediction of each SNP and all variants in LD with  $r^2 > 0.2$ . GTEEx Portal V6p (Broad Institute, Boston, MA) and Single Nucleotide Polymorphism Annotator SNIPA (HelmholtzZentrum, Munich, Germany) were used to annotate publicly-available expression data from GTEEx and the Multiple Tissue Human Expression Resource Consortium (MuTHER).

| Locus Characteristics |                   |                              |                      | Protein Characteristics                                                |                           |                                     |                               |                                       | FHS Discovery Cohort Correlations |                    |              |                | MDCS Validation Cohort Correlations |      |          |       | Meta Analysis of FHS and MDCS |       |      | Prior Report in Literature |                |               |                  | Annotation                                                                             |
|-----------------------|-------------------|------------------------------|----------------------|------------------------------------------------------------------------|---------------------------|-------------------------------------|-------------------------------|---------------------------------------|-----------------------------------|--------------------|--------------|----------------|-------------------------------------|------|----------|-------|-------------------------------|-------|------|----------------------------|----------------|---------------|------------------|----------------------------------------------------------------------------------------|
| Rank Order List       | Sentinel Variant  | Variant Chromosomal Location | Variant Nearest Gene | SOMAmer Target Protein                                                 | SOMAmer Target UniProt ID | Context of Association (Chromosome) | Context of Association (<1Mb) | Context of Association (Closest Gene) | SOMAmer ID                        | P-Value            | Beta         | h <sup>2</sup> | SOMAmer ID                          | N    | P-Value  | Beta  | P-Value                       | Beta  | N    | Reported SNP               | R <sup>2</sup> | Reported Beta | Reported P-Value | pQTL Notes and Sentinel SNP Prior Associations                                         |
| 1                     | rs2519093         | chr9:136141870               | ABO                  | E Selectin                                                             | P16581                    |                                     | TRANS                         |                                       | 3470 1                            | 1.6E-82            | 1.10         | 31.7%          | 3470 1                              | 1419 | 8.5E-182 | 1.01  | 7.3E-262                      | 1.03  | 2178 | rs651007                   | 0.92           | -0.94         | 1.2E-96          | CAD (P=1.2E-11), MI (P=3.5E-17), DM2 (P=9.2E-5), Tot Chol (P=1.2E-26), LDL (P=1.2E-30) |
| 2                     | rs8176672         | chr9:136142185               | ABO                  | Cadherin 5                                                             | P33151                    |                                     | TRANS                         |                                       | 2819 23                           | 1.5E-35            | -1.13        | 16.6%          | 2819 23                             | 1421 | 1.3E-61  | -1.08 | 2.6E-95                       | -1.09 | 2180 |                            |                |               |                  | LDL (P=3.2E-7)                                                                         |
| 3                     | rs112635299       | chr14:94838142               | SERPINA1             | Alpha 1 antitrypsin                                                    | P01009                    | Same                                | CIS                           | Cognate Gene                          | 3580 25                           | 7.0E-15            | 1.41         | 7.2%           | 3580 25                             | 1391 | 4.0E-30  | 1.33  | 2.5E-43                       | 1.36  | 2150 |                            |                |               |                  | CAD (P=3.9E-4)                                                                         |
| 4                     | rs217181          | chr16:72114002               | TXNL4B               | Heparin cofactor 2                                                     | P05546                    |                                     | TRANS                         |                                       | 3316 58                           | 4.6E-14            | -0.49        | 6.7%           | 3316 58                             | 1421 | 8.2E-19  | -0.41 | 4.4E-31                       | -0.44 | 2180 | rs3852789                  | 0.32           | 0.23          | 1.0E-04          | Tot Chol (P=8.1E-31), Trigs (P=1.8E-4), LDL (P=1.1E-25)                                |
| 5                     | rs41290120        | chr19:45382675               | NECTIN2              | Apolipoprotein E                                                       | P02649                    | Same                                | CIS                           |                                       | 2418 55                           | 2.2E-11            | 1.50         | 5.5%           | 2418 55                             | 1397 | 4.9E-25  | 1.01  | 5.7E-34                       | 1.09  | 2156 |                            |                |               |                  | CAD (P=1.4E-10), MI (P=2.6E-9)                                                         |
| 6                     | rs4846923         | chr1:230307222               | GALNT2               | Neuropilin 1                                                           | O14786                    |                                     | TRANS                         |                                       | 3214 3                            | 2.4E-09            | 0.34         | 4.4%           | 5542-22                             | 1318 | 4.6E-11  | 0.27  | 9.5E-19                       | 0.30  | 2077 | rs17315646                 | 0.67           | -0.22         | 8.4E-07          | Trigs (P=4.3E-14), HDL (P=8.3E-24)                                                     |
| 7                     | rs1320668         | chr11:116967666              | SIK3                 | Apolipoprotein E                                                       | P02649                    |                                     | TRANS                         |                                       | 2418 55                           | 4.3E-09            | -0.50        | 4.3%           | 2418 55                             | 1410 | 9.7E-04  | -0.21 | 8.1E-10                       | -0.31 | 2169 |                            |                |               |                  | Tot Chol (P=2.5E-14), Trigs (P=1.6E-43), LDL (P=1.0E-5)                                |
| 8                     | rs635634          | chr9:136155000               | ABO                  | Hepatocyte growth factor receptor                                      | P08581                    |                                     | TRANS                         |                                       | 2837 3                            | 3.0E-08 (1.1E-06)  | 0.38 (0.32)  | 3.8%           | 2837 3                              | 1421 | 4.1E-20  | 0.39  | 7.7E-27                       | 0.39  | 2180 | rs651007                   | 0.96           | -0.44         | 3.3E-19          | DM2 (P=1.4E-4), Tot Chol (P=2.5E-35), LDL (P=1.8E-41)                                  |
| 9                     | rs11682107        | chr2:113835522               | IL1F10               | Interleukin 1 receptor type 1                                          | P14778                    | Same                                | TRANS                         |                                       | 2991 9                            | 4.5E-08            | 0.29         | 3.8%           | 2991 9                              | 1318 | 1.5E-03  | 0.12  | 7.4E-09                       | 0.18  | 2077 | rs6759676                  | 0.90           | -0.16         | 1.2E-04          | MI (P=3.4E-5)                                                                          |
| 10                    | rs740750          | chr5:149515074               | PDGFRB               | Platelet derived growth factor receptor beta                           | P09619                    | Same                                | CIS                           | Cognate Gene                          | 3459 49                           | 3.0E-308           | 1.16         | 65.6%          | 3459 49                             | 1421 | 3.0E-308 | 1.16  | 3.0E-308                      | 1.16  | 2180 | rs3776081                  | 0.46           | -0.96         | 3.3E-113         | Evaluated by MR in Supplemental Figure 2                                               |
| 11                    | rs13469           | chr17:26676135               | POLDIP2              | AH receptor interacting protein                                        | O00170                    |                                     | TRANS                         |                                       | 3839 60                           | 8.8E-53            | -0.73        | 23.0%          | 3839 60                             | 1421 | 1.2E-04  | -0.14 | 4.1E-35                       | -0.36 | 2180 |                            |                |               |                  | Evaluated by MR in Supplemental Figure 2                                               |
| 12                    | rs72688441        | chr1:46051053                | NASP                 | Alcohol dehydrogenase [NADP(+)]                                        | P14550                    | Same                                | CIS                           |                                       | 4192 10                           | 5.5E-44            | 1.65         | 20.0%          | 4192 10                             | 1413 | 1.9E-81  | 1.19  | 5.4E-121                      | 1.29  | 2172 |                            |                |               |                  | Evaluated by MR in Supplemental Figure 2                                               |
| 13                    | rs6787861         | chr3:190352527               | IL1RAP               | Interleukin 1 Receptor accessory protein                               | Q9NPH3                    | Same                                | CIS                           | Cognate Gene                          | 2630 12                           | 1.8E-162           | -1.37        | 46.8%          | 2630 12                             | 1153 | 2.6E-200 | -1.37 | 3.0E-308                      | -1.37 | 1912 | rs1024948                  | 0.84           | 1.35          | 2.5E-165         |                                                                                        |
| 14                    | rs11653614        | chr17:77703751               | ENPP7                | Ectonucleotide pyrophosphatase/phosphodiesterase family member 7       | Q6UWV6                    | Same                                | CIS                           | Cognate Gene                          | 4435 66                           | 1.8E-107           | -0.97        | 38.4%          | 4435 66                             | 1356 | 1.2E-262 | -0.99 | 3.0E-308                      | -0.98 | 2115 |                            |                |               |                  |                                                                                        |
| 15                    | rs11582423        | chr1:150493925               | FALEC                | Extracellular matrix protein 1                                         | Q16610                    | Same                                | CIS                           |                                       | 3366 51                           | 2.1E-76            | 0.89         | 30.0%          | 3366 51                             | 1374 | 8.3E-106 | 0.72  | 1.9E-178                      | 0.78  | 2133 | rs13294                    | 1.00           | -0.85         | 7.7E-102         |                                                                                        |
| 16                    | rs3869574         | chr19:41284915               | RAB4B                | Melanoma derived growth regulatory protein                             | Q16674                    | Same                                | CIS                           |                                       | 2687 2                            | 5.2E-60            | -1.39        | 25.9%          | 2687 2                              | 1418 | 3.4E-120 | -1.31 | 4.1E-178                      | -1.33 | 2177 |                            |                |               |                  |                                                                                        |
| 17                    | rs10445391        | chr17:34306106               | CCL16                | C C motif chemokine 16                                                 | O15467                    | Same                                | CIS                           | Cognate Gene                          | 4913 78                           | 2.5E-67            | 1.79         | 25.6%          | 4913 78                             | 1368 | 6.6E-222 | 1.55  | 2.8E-286                      | 1.59  | 2127 | rs33995560                 | 0.82           | -1.39         | 1.9E-95          |                                                                                        |
| 18                    | rs2041740         | chr2:102989734               | IL18R1               | Interleukin 18 receptor 1                                              | Q13478                    | Same                                | CIS                           | Cognate Gene                          | 3446 7                            | 1.8E-57            | -0.85        | 24.9%          | 3446 7                              | 1330 | 1.3E-136 | -0.89 | 4.9E-192                      | -0.88 | 2089 | rs2058622                  | 1.00           | 1.00          | 9.0E-108         |                                                                                        |
| 19                    | rs35647509        | chr2:143808067               | KYNU                 | Kynureninase                                                           | Q16719                    | Same                                | CIS                           | Cognate Gene                          | 4559 64                           | 2.8E-50            | 0.95         | 22.4%          | 4559 64                             | 1351 | 1.0E-111 | 1.03  | 7.3E-160                      | 1.00  | 2110 | rs9013                     | 1.00           | -1.05         | 1.0E-81          |                                                                                        |
| 20                    | rs73707827        | chr7:83039780                | SEMA3E               | Semaphorin 3E                                                          | O15041                    | Same                                | CIS                           | Cognate Gene                          | 5363 51                           | 8.4E-40            | 0.92         | 17.9%          | 5363 51                             | 1421 | 4.6E-124 | 1.09  | 4.6E-161                      | 1.04  | 2180 | rs17284969                 | 0.95           | -1.07         | 2.4E-65          |                                                                                        |
| 21                    | rs10737680        | chr1:196679455               | CFH                  | Complement factor H                                                    | P08603                    | Same                                | CIS                           | Cognate Gene                          | 4159 130                          | 2.33E-36 (8.6E-29) | -0.61 (0.59) | 17.2%          | 4159 130                            | 1421 | 4.0E-48  | -0.50 | 5.4E-82                       | -0.54 | 2180 | rs3753395                  | 1.00           | 0.50          | 3.9E-36          |                                                                                        |
| 22                    | rs7024491         | chr9:137775084               | FCN2                 | Ficolin 2                                                              | Q15485                    | Same                                | CIS                           | Cognate Gene                          | 3313 21                           | 7.4E-34            | 0.59         | 16.1%          | 3313 21                             | 1421 | 2.4E-44  | 0.51  | 4.3E-76                       | 0.54  | 2180 |                            |                |               |                  |                                                                                        |
| 23                    | rs1102934         | chr17:34389914               | CCL18                | C C motif chemokine 18                                                 | P55774                    | Same                                | CIS                           | Cognate Gene                          | 3044 3                            | 1.9E-35            | -0.86        | 15.6%          | 3044 3                              | 1421 | 1.3E-89  | -0.97 | 7.3E-123                      | -0.93 | 2180 | rs9904601                  | 0.79           | 0.86          | 2.5E-43          |                                                                                        |
| 24                    | rs4549181         | chr20:23728873               | CST1                 | Cystatin SN                                                            | P01037                    | Same                                | CIS                           | Cognate Gene                          | 5459 33                           | 1.6E-32            | 0.63         | 15.3%          | 5459 33                             | 1377 | 2.0E-63  | 0.67  | 4.9E-94                       | 0.66  | 2136 | rs2070856                  | 0.31           | -0.55         | 5.6E-19          |                                                                                        |
| 25                    | rs7207028         | chr17:48916052               | WFIKN2               | WAP, Kazal, immunoglobulin, Kunitz and NTR domain containing protein 2 | Q8TEU8                    | Same                                | CIS                           | Cognate Gene                          | 3235 50                           | 1.1E-29            | -0.58        | 14.0%          | 3235 50                             | 1402 | 5.6E-55  | -0.60 | 7.1E-83                       | -0.59 | 2161 | rs3803884                  | 0.94           | 0.56          | 1.4E-40          |                                                                                        |
| 26                    | rs9722289         | chr9:136370287               | TMEM8C               | E Selectin                                                             | P16581                    |                                     | TRANS                         |                                       | 3470 1                            | 2.0E-28            | 4.51         | 13.4%          | 3470 1                              | 1399 | 1.1E-05  | 0.47  | 1.8E-12                       | 0.73  | 2158 |                            |                |               |                  |                                                                                        |
| 27                    | rs4549181         | chr20:23728873               | CST1                 | Cystatin SA                                                            | P09228                    | Same                                | CIS                           |                                       | 4324 33                           | 7.7E-27            | 0.57         | 12.6%          | 4324 33                             | 1377 | 1.2E-39  | 0.54  | 1.0E-64                       | 0.55  | 2136 |                            |                |               |                  |                                                                                        |
| 28                    | rs72702561        | chr1:150685716               | HORMAD1              | Cathepsin S                                                            | P25774                    | Same                                | CIS                           |                                       | 3181 50                           | 1.1E-25            | 1.09         | 12.5%          | 3181 50                             | 1385 | 7.2E-42  | 0.92  | 2.0E-65                       | 0.97  | 2144 | rs41271951                 | 1.00           | -0.96         | 4.1E-40          |                                                                                        |
| 29                    | rs73043837        | chr6:169617889               | THBS2                | Thrombospondin 2                                                       | P35442                    | Same                                | CIS                           | Cognate Gene                          | 3339 33                           | 9.1E-26            | -0.83        | 12.2%          | 3339 33                             | 1421 | 9.2E-47  | -0.80 | 9.5E-71                       | -0.81 | 2180 |                            |                |               |                  |                                                                                        |
| 30                    | rs151254127       | chr1:150257775               | C1orf54              | Extracellular matrix protein 1                                         | Q16610                    | Same                                | CIS                           |                                       | 3366 51                           | 8.3E-25            | 4.59         | 11.8%          | 3366 51                             | 1299 | 2.8E-08  | 0.69  | 4.9E-16                       | 0.97  | 2058 |                            |                |               |                  |                                                                                        |
| 31                    | rs6695321         | chr1:196675861               | CFH                  | Complement C1s subcomponent                                            | P09871                    |                                     | TRANS                         |                                       | 3590 8                            | 4.8E-24            | 0.51         | 11.8%          | 3590 8                              | 554  | 2.7E-27  | 0.60  | 2.3E-49                       | 0.55  | 1313 | rs10922096                 | 0.60           | -0.38         | 1.0E-21          |                                                                                        |
| 32                    | rs75776028        | chr1:169653795               | C1orf112             | L Selectin                                                             | P14151                    | Same                                | CIS                           |                                       | 4831 4                            | 5.7E-25            | 0.55         | 10.9%          | 4831 4                              | 1196 | 1.0E-35  | 0.55  | 5.9E-59                       | 0.55  | 1955 | rs12938                    | 0.88           | -0.49         | 4.5E-25          |                                                                                        |
| 33                    | 1:46767127:TCTC_  | chr1:46767127                | LRRC41               | Alcohol dehydrogenase [NADP(+)]                                        | P14550                    | Same                                | CIS                           |                                       | 4192 10                           | 2.3E-20            | -1.64        | 10.0%          | 4192 10                             | 1267 | 1.0E-23  | -0.90 | 2.3E-39                       | -1.05 | 2026 |                            |                |               |                  |                                                                                        |
| 34                    | rs2276109         | chr11:102745791              | MMP12                | Macrophage metalloelastase                                             | P39900                    | Same                                | CIS                           | Cognate Gene                          | 4496 60                           | 1.4E-25            | 0.68         | 9.9%           | 4496 60                             | 1420 | 5.8E-43  | 0.67  | 8.7E-67                       | 0.67  | 2179 | rs17368582                 | 1.00           | -0.74         | 1.5E-37          |                                                                                        |
| 35                    | rs157594          | chr19:45425175               | APOC1P1              | Apolipoprotein E (isoform E2)                                          | P02649                    | Same                                | CIS                           |                                       | 5312 49                           | 3.9E-20            | -0.99        | 9.9%           | 5312 49                             | 744  | 1.0E-09  | -0.28 | 2.8E-20                       | -0.39 | 1503 |                            |                |               |                  |                                                                                        |
| 36                    | rs11576766        | chr1:9010984                 | CA6                  | Carbonic anhydrase 6                                                   | P23280                    | Same                                | CIS                           | Cognate Gene                          | 3352 80                           | 1.1E-22            | 0.45         | 9.5%           | 3352 80                             | 1395 | 1.1E-51  | 0.50  | 1.8E-72                       | 0.48  | 2154 | rs6577541                  | 0.49           | 0.24          | 3.7E-08          |                                                                                        |
| 37                    | 1:27699670:AG_A   | chr1:27699670                | FCN3                 | Ficolin 3                                                              | O75636                    | Same                                | CIS                           | Cognate Gene                          | 3811 1                            | 4.6E-19            | -1.89        | 9.2%           | 5462-62                             | 1374 | 1.1E-07  | -1.49 | 6.1E-25                       | -1.74 | 2133 |                            |                |               |                  |                                                                                        |
| 38                    | rs6445607         | chr3:53877149                | IL17RB               | interleukin 17 receptor B                                              | Q9NRM6                    | Same                                | CIS                           | Cognate Gene                          | 5084 154                          | 1.3E-17            | -0.43        | 8.5%           | 5084 154                            | 1418 | 2.2E-31  | -0.45 | 2.7E-47                       | -0.44 | 2177 | rs4453827                  | 0.32           | 0.33          | 6.4E-11          |                                                                                        |
| 39                    | 2:103221989:GTGCC | chr2:103221989               | IL18R1               | Interleukin 18 receptor 1                                              | Q13478                    | Same                                | CIS                           |                                       | 3446 7                            | 2.1E-16            | -0.68        | 8.1%           | 3446 7                              | 883  | 1.3E-18  | -0.53 | 6.3E-33                       | -0.58 | 1642 | rs1016160                  | 0.31           | 0.66          | 1.1E-29          |                                                                                        |
| 40                    | rs12134610        | chr1:196422826               | KCNT2                | Complement factor H                                                    | P08603                    | Same                                | CIS                           |                                       | 4159 130                          | 4.2E-16            | -1.50        | 8.0%           | 4159 130                            | 1204 | 7.1E-05  | -0.36 | 1.1E-12                       | -0.57 | 1963 | rs10754196                 | 0.30           | 0.32          | 5.4E-14          |                                                                                        |
| 41                    | rs72684498        | chr1:45672811                | ZSWIM5               | Alcohol dehydrogenase [NADP(+)]                                        | P14550                    | Same                                | CIS                           |                                       | 4192 10                           | 3.2E-16            | 3.07         | 8.0%           | 4192 10                             | 1314 | 2.1E-12  | 1.29  | 4.1E-23                       | 1.64  | 2073 |                            |                |               |                  |                                                                                        |
| 42                    | rs109467          | chr7:83278893                | SEMA3E               | Semaphorin 3E                                                          | O15041                    | Same                                | CIS                           | Cognate Gene                          | 5363 51                           | 2.7E-16            | -0.43        | 7.8%           | 5363 51                             | 1389 | 3.5E-22  | -0.36 | 1.5E-36                       | -0.38 | 2148 | rs536299                   | 0.90           | 0.47          | 2.2E-26          |                                                                                        |
| 43                    | rs77625270        | chr19:8121189                | CCL25                | C C motif chemokine 25                                                 | O15444                    | Same                                | CIS                           | Cognate Gene                          | 2705 5                            | 1.3E-15            | 1.20         | 7.7%           | 2705 5                              | 1402 | 8.1E-64  | 1.12  | 1.1E-77                       | 1.14  | 2161 | rs3848570                  | 0.46           | -0.92         | 7.6E-21          |                                                                                        |
| 44                    | rs9661107         | chr1:150987886               | PRUNE1               | Cathepsin S                                                            | P25774                    | Same                                | CIS                           |                                       | 3181 50                           | 1.1E-15            | 0.76         | 7.7%           | 3181 50                             | 1403 | 2.7E-28  | 0.75  |                               |       |      |                            |                |               |                  |                                                                                        |

|     |                    |                 |              |                                                               |        |      |       |              |          |                   |             |      |          |      |         |       |         |       |      |            |      |       |         |  |  |
|-----|--------------------|-----------------|--------------|---------------------------------------------------------------|--------|------|-------|--------------|----------|-------------------|-------------|------|----------|------|---------|-------|---------|-------|------|------------|------|-------|---------|--|--|
| 55  | rs79427717         | chr1:150203716  | ANP32E       | Cathepsin S                                                   | P25774 | Same | CIS   |              | 3181 50  | 2.2E-12           | 1.07        | 6.0% | 3181 50  | 1336 | 8.4E-18 | 0.75  | 7.3E-28 | 0.83  | 2095 |            |      |       |         |  |  |
| 56  | rs11679466         | chr2:152142088  | NMI          | Tumor necrosis factor inducible gene 6 protein                | P98066 | Same | CIS   |              | 5036 50  | 4.9E-12           | -0.35       | 5.7% | 5036 50  | 1410 | 1.8E-21 | -0.35 | 6.4E-32 | -0.35 | 2169 | rs289828   | 0.97 | 0.39  | 2.1E-21 |  |  |
| 57  | rs115204832        | chr6:31704411   | CLIC1        | Complement C2                                                 | P06681 | Same | CIS   |              | 3186 2   | 9.7E-12           | 1.56        | 5.7% | 3186 2   | 1386 | 4.6E-35 | 1.69  | 3.8E-45 | 1.66  | 2145 |            |      |       |         |  |  |
| 58  | rs157594           | chr19:45425175  | APOC1P1      | Apolipoprotein E (isoform E4)                                 | P02649 | Same | CIS   |              | 2938 55  | 2.1E-11           | -0.74       | 5.5% | 2938 55  | 744  | 1.0E-09 | -0.28 | 2.8E-20 | -0.39 | 1503 |            |      |       |         |  |  |
| 59  | rs2381409          | chr9:35829390   | FAM221B      | Hemojuvelin                                                   | Q6ZVN8 |      | TRANS |              | 3332 57  | 1.6E-11           | -0.35       | 5.4% | 3332 57  | 1318 | 5.9E-07 | -0.19 | 1.1E-15 | -0.25 | 2077 | rs2236293  | 0.40 | -0.33 | 4.6E-14 |  |  |
| 60  | rs61765448         | chr1:64611828   | ROR1-AS1     | Tyrosine protein kinase transmembrane receptor ROR1           | Q01973 | Same | CIS   | Cognate Gene | 2590 69  | 2.4E-11           | 0.43        | 5.4% |          | 1347 | 7.9E-15 | 0.38  | 1.5E-24 | 0.40  | 2106 | rs1408416  | 0.91 | -0.34 | 7.0E-09 |  |  |
| 61  | rs1864401          | chr10:43605902  | RET          | Proto oncogene tyrosine protein kinase receptor Ret           | P07949 | Same | CIS   | Cognate Gene | 3220 40  | 1.8E-09           | 0.34        | 4.2% | 3220 40  | 1406 | 2.1E-24 | 0.42  | 5.0E-32 | 0.39  | 2165 | rs2505535  | 0.97 | -0.43 | 2.8E-19 |  |  |
| 62  | 17:26572852:T_TTT  | chr17:26572852  |              | WNT1 inducible signaling pathway protein 1                    | O95388 |      | TRANS |              | 3057 55  | 9.6E-09           | -0.32       | 4.0% | 3057 55  | 1324 | 4.9E-21 | -0.34 | 3.1E-28 | -0.34 | 2083 | rs2239908  | 0.32 | -0.29 | 1.1E-10 |  |  |
| 63  | rs10033900         | chr4:110659067  | CFI          | Complement factor I                                           | P05156 | Same | CIS   | Cognate Gene | 2567 5   | 2.2E-09 (2.0E-09) | 0.34 (0.30) | 4.3% | 2567 5   | 1421 | 1.3E-16 | 0.30  | 2.1E-24 | 0.31  | 2180 | rs7439493  | 0.47 | 0.36  | 1.6E-17 |  |  |
| 64  | rs72676591         | chr1:45436014   | EIF2B3       | Alcohol dehydrogenase [NADP(+)]                               | P14550 | Same | CIS   |              | 4192 10  | 3.9E-10           | 1.48        | 4.8% | 4192 10  | 1215 | 5.9E-16 | 0.81  | 4.7E-23 | 0.91  | 1974 |            |      |       |         |  |  |
| 65  | rs12983058         | chr19:51642784  | SIGLEC9      | Sialic acid binding Ig like lectin 7                          | Q9Y286 | Same | CIS   |              | 2742 68  | 3.7E-10           | -0.39       | 4.9% | 2742 68  | 1421 | 4.5E-15 | -0.31 | 1.9E-23 | -0.34 | 2180 |            |      |       |         |  |  |
| 66  | rs144769310        | chr6:32133344   | EGFL8        | Advanced glycosylation end product specific receptor, soluble | Q15109 | Same | CIS   |              | 4125 52  | 2.4E-09           | 0.71        | 4.4% | 4125 52  | 1414 | 1.3E-13 | 0.65  | 2.0E-21 | 0.67  | 2173 |            |      |       |         |  |  |
| 67  | rs11640313         | chr16:418462    | MRPL28       | Contactin 1                                                   | Q12860 |      | TRANS |              | 2974 61  | 2.3E-11           | -0.36       | 5.3% | 2974 61  | 1333 | 2.0E-12 | -0.26 | 1.1E-21 | -0.29 | 2092 | rs12719801 | 0.41 | -0.22 | 1.3E-06 |  |  |
| 68  | rs112211052        | chr6:31397654   | HCP5         | Complement C2                                                 | P06681 | Same | CIS   |              | 3186 2   | 4.1E-09           | 0.76        | 4.3% | 3186 2   | 1386 | 1.3E-11 | 0.58  | 6.4E-19 | 0.63  | 2145 |            |      |       |         |  |  |
| 69  | rs8177107          | chr7:142554145  | EPHB6        | Ephrin type B receptor 6                                      | O15197 | Same | CIS   | Cognate Gene | 5078 82  | 1.4E-08           | 0.40        | 3.9% | 5078 82  | 1379 | 2.2E-10 | 0.30  | 3.3E-17 | 0.33  | 2138 |            |      |       |         |  |  |
| 70  | rs13132712         | chr4:74345896   | AFM          | Afamin                                                        | P43652 | Same | CIS   | Cognate Gene | 4763 31  | 5.4E-10           | 0.93        | 4.8% | 4763 31  | 1381 | 5.5E-10 | 0.83  | 1.9E-18 | 0.87  | 2140 |            |      |       |         |  |  |
| 71  | 20:60948294:ATC_A  | chr20:60948294  |              | Laminin                                                       | P25391 |      | TRANS |              | 2728 62  | 3.4E-10           | -0.54       | 4.6% | 2728 62  | 1146 | 8.8E-10 | -0.28 | 6.9E-17 | -0.34 | 1905 |            |      |       |         |  |  |
| 72  | rs1856746          | chr1:207143422  | FCAMR        | Polymeric immunoglobulin receptor                             | P01833 | Same | CIS   |              | 3216 2   | 2.6E-10           | 0.32        | 4.8% | 3216 2   | 1421 | 1.7E-09 | 0.22  | 1.0E-17 | 0.25  | 2180 | rs291083   | 0.85 | -0.30 | 1.3E-11 |  |  |
| 73  | rs11623662         | chr14:66021192  | FUT8         | Advanced glycosylation end product specific receptor, soluble | Q15109 |      | TRANS |              | 4125 52  | 4.3E-08           | 0.29        | 3.7% | 4125 52  | 1412 | 9.9E-09 | 0.22  | 3.5E-15 | 0.25  | 2171 | rs12882200 | 0.63 | 0.22  | 1.2E-07 |  |  |
| 74  | rs150845796        | chr1:196884258  | CFHR2        | Complement factor H                                           | P08603 | Same | CIS   |              | 4159 130 | 3.7E-10           | 1.16        | 4.9% | 4159 130 | 1205 | 2.1E-08 | 0.66  | 5.8E-16 | 0.81  | 1964 |            |      |       |         |  |  |
| 75  | 11:126226554:GGAGT | chr11:126226554 | ST3GAL4      | Lymphatic vessel endothelial hyaluronin acid receptor 1       | Q9Y5Y7 | Same | TRANS |              | 3206 4   | 1.2E-08           | 0.61        | 3.9% | 3206 4   | 1412 | 2.3E-08 | 0.41  | 4.6E-15 | 0.47  | 2171 |            |      |       |         |  |  |
| 76  | rs805524           | chr10:43384889  |              | Proto oncogene tyrosine protein kinase receptor Ret           | P07949 | Same | CIS   |              | 3220 40  | 8.6E-09           | 0.36        | 3.9% | 3220 40  | 1371 | 3.7E-08 | 0.27  | 2.8E-15 | 0.31  | 2130 | rs2487917  | 0.50 | -0.40 | 2.6E-10 |  |  |
| 77  | rs2506149          | chr10:33480713  | NRP1         | Neuropilin 1                                                  | O14786 | Same | CIS   | Cognate Gene | 3214 3   | 4.2E-08           | 0.29        | 3.7% | 5542-22  | 1394 | 6.6E-07 | 0.19  | 3.6E-13 | 0.23  | 2153 | rs2247383  | 0.78 | -0.27 | 3.0E-10 |  |  |
| 78  | 3:132391213:C_CAT  | chr3:132391213  | UBA5         | C C motif chemokine 21                                        | O00585 |      | TRANS |              | 2516 57  | 3.3E-12           | -0.47       | 5.9% | 2516 57  | 1391 | 8.7E-04 | -0.18 | 3.4E-12 | -0.29 | 2150 |            |      |       |         |  |  |
| 79  | rs11534419         | chr9:136388223  | TMEM8C       | Cadherin 5                                                    | P33151 |      | TRANS |              | 2819 23  | 8.1E-12           | -1.61       | 5.7% | 2819 23  | 975  | 9.6E-04 | -0.15 | 5.5E-06 | -0.20 | 1734 |            |      |       |         |  |  |
| 80  | rs6679295          | chr1:169522943  | F5           | Tissue factor pathway inhibitor                               | P10646 |      | TRANS |              | 3336 50  | 5.1E-10           | -0.70       | 4.5% | 3336 50  | 713  | 2.7E-03 | -0.22 | 3.2E-09 | -0.37 | 1472 | rs4524     | 0.36 | 0.21  | 1.0E-05 |  |  |
| 81  | rs10816649         | chr9:110981973  | LOC105376214 | Dickkopf like protein 1                                       | Q9UK85 |      | TRANS |              | 3644 5   | 4.4E-08           | -0.59       | 3.6% | 3644 5   | 1416 | 6.2E-03 | 0.24  | 2.1E-01 | -0.08 | 2175 |            |      |       |         |  |  |
| 82  | rs143618256        | chr1:150031103  | LOC105371427 | Extracellular matrix protein 1                                | Q16610 | Same | CIS   |              | 3366 51  | 1.2E-14           | 7.71        | 7.0% | 3366 51  | 1327 | 1.3E-02 | 0.66  | 1.1E-05 | 1.13  | 2086 |            |      |       |         |  |  |
| 83  | 12:7589946:ATATT   | chr12:7589946   | CD163L1      | Glucose 6 phosphate isomerase                                 | P06744 |      | TRANS |              | 4272 46  | 1.1E-08           | -0.95       | 4.1% | 4272 46  | 1408 | 1.4E-02 | -0.24 | 5.5E-07 | -0.42 | 2167 | rs7485194  | 1.00 | -0.72 | 5.4E-09 |  |  |
| 84  | rs79701073         | chr9:116898329  | COL27A1      | Cystatin SN                                                   | P01037 |      | TRANS |              | 5459 33  | 3.2E-08           | 1.45        | 3.8% | 5459 33  | 1387 | 2.8E-02 | -0.30 | 5.5E-01 | 0.07  | 2146 |            |      |       |         |  |  |
| 85  | rs4733300          | chr8:32016943   | NRG1         | Kynureninase                                                  | P16719 |      | TRANS |              | 4559 64  | 2.9E-08           | 0.47        | 3.8% | 4559 64  | 855  | 7.0E-02 | -0.11 | 9.5E-02 | 0.08  | 1614 |            |      |       |         |  |  |
| 86  | rs150845796        | chr1:196884258  | CFHR2        | Complement C1s subcomponent                                   | P09871 |      | TRANS |              | 3590 8   | 2.3E-08           | 1.03        | 3.9% | 3590 8   | 468  | 8.0E-02 | 0.28  | 7.2E-07 | 0.59  | 1227 |            |      |       |         |  |  |
| 87  | rs4403878          | chr12:81985012  | PPFIA2       | Sonic hedgehog protein                                        | Q15465 |      | TRANS |              | 2743 5   | 3.0E-08           | -0.61       | 3.9% | 2743 5   | 1359 | 1.1E-01 | 0.13  | 4.2E-02 | -0.13 | 2118 |            |      |       |         |  |  |
| 88  | rs79701073         | chr9:116898329  | COL27A1      | Cystatin SA                                                   | P09228 |      | TRANS |              | 4324 33  | 4.7E-08           | 1.42        | 3.6% | 4324 33  | 1387 | 1.2E-01 | -0.21 | 2.5E-01 | 0.14  | 2146 |            |      |       |         |  |  |
| 89  | rs8092427          | chr18:42608214  | SETBP1       | Adiponectin                                                   | Q15848 |      | TRANS |              | 3554 24  | 2.2E-09           | -0.58       | 4.0% | 3554 24  | 954  | 1.4E-01 | -0.09 | 1.2E-05 | -0.22 | 1713 |            |      |       |         |  |  |
| 90  | rs9911014          | chr17:26383960  | NLK          | AH receptor interacting protein                               | O00170 |      | TRANS |              | 3839 60  | 7.2E-12           | 0.45        | 5.7% | 3839 60  | 1420 | 1.4E-01 | 0.07  | 2.3E-07 | 0.20  | 2179 |            |      |       |         |  |  |
| 91  | rs6076759          | chr20:4947034   | SLC23A2      | Endothelial cell selective adhesion molecule                  | Q96AP7 |      | TRANS |              | 2981 9   | 2.0E-08           | 1.35        | 3.6% | 2981 9   | 1164 | 1.6E-01 | 0.14  | 5.5E-04 | 0.32  | 1923 |            |      |       |         |  |  |
| 92  | rs73235337         | chr13:77273301  | KCTD12       | Reticulon 4 receptor                                          | Q9BZR6 |      | TRANS |              | 5105 2   | 2.1E-08           | 0.61        | 3.9% | 5105 2   | 1415 | 1.7E-01 | -0.10 | 4.4E-02 | 0.12  | 2174 |            |      |       |         |  |  |
| 93  | rs12285347         | chr11:102396607 | MMP7         | Matrilysin                                                    | P09237 | Same | CIS   | Cognate Gene | 2789 26  | 3.1E-10           | 0.32        | 4.4% | 2789 26  | 1421 | 1.7E-01 | 0.05  | 1.9E-06 | 0.14  | 2180 | rs7128808  | 0.32 | -0.19 | 2.5E-05 |  |  |
| 94  | rs149923323        | chr6:2711099    | MYLK4        | Wnt inhibitory factor 1                                       | Q9Y5W5 |      | TRANS |              | 2848 2   | 4.7E-08           | 1.48        | 3.7% | 2848 2   | 1320 | 1.9E-01 | -0.20 | 1.1E-01 | 0.21  | 2079 |            |      |       |         |  |  |
| 95  | rs114805987        | chr11:60200226  | MS4A5        | Ephrin A5                                                     | P52803 |      | TRANS |              | 2615 60  | 3.7E-08           | 1.92        | 3.8% | 2615 60  | 1304 | 2.3E-01 | -0.30 | 2.5E-02 | 0.46  | 2063 |            |      |       |         |  |  |
| 96  | rs12112554         | chr7:135590210  |              | Epidermal growth factor receptor                              | P00533 | Same | TRANS |              | 2677 1   | 3.4E-08           | -2.32       | 3.2% | 2677 1   | 1379 | 2.3E-01 | 0.19  | 3.9E-01 | -0.13 | 2138 |            |      |       |         |  |  |
| 97  | rs390322           | chr5:9390217    | SEMA5A       | Desmoglein 2                                                  | Q14126 |      | TRANS |              | 5071 3   | 3.9E-08           | -0.29       | 3.8% | 5071 3   | 554  | 2.4E-01 | 0.07  | 6.0E-04 | -0.14 | 1313 |            |      |       |         |  |  |
| 98  | rs11733361         | chr4:128672526  | SLC25A31     | Galectin 3 binding protein                                    | Q08380 |      | TRANS |              | 5000 52  | 1.9E-08           | -0.60       | 3.8% | 5000 52  | 1390 | 2.5E-01 | 0.08  | 3.2E-02 | -0.13 | 2149 |            |      |       |         |  |  |
| 99  | rs117956663        | chr11:5786209   | OR56B2P      | Limbic system associated membrane protein                     | Q13449 |      | TRANS |              | 2999 6   | 4.0E-09           | 2.88        | 3.4% | 2999 6   | 1388 | 2.5E-01 | 0.54  | 9.6E-07 | 1.66  | 2147 |            |      |       |         |  |  |
| 100 | rs11787241         | chr8:19105847   | LOC105379300 | Alpha 1 antitrypsin                                           | P01009 |      | TRANS |              | 3580 25  | 2.8E-08           | -0.43       | 3.8% | 3580 25  | 444  | 2.8E-01 | -0.06 | 4.3E-05 | -0.18 | 1203 |            |      |       |         |  |  |
| 101 | rs334516           | chr7:47571488   | TNS3         | Antithrombin III                                              | P01008 |      | TRANS |              | 3344 60  | 2.8E-08           | -0.30       | 3.6% | 3344 60  | 1263 | 3.4E-01 | 0.04  | 1.4E-02 | -0.08 | 2022 |            |      |       |         |  |  |
| 102 | rs8042987          | chr15:26179463  | LOC100128714 | Galectin 4                                                    | P56470 |      | TRANS |              | 2982 82  | 1.9E-08           | 0.39        | 3.8% | 2982 82  | 1298 | 3.8E-01 | -0.03 | 4.4E-02 | 0.07  | 2057 |            |      |       |         |  |  |
| 103 | rs75481816         | chr5:114597748  | PGGT1B       | Coagulation Factor X                                          | P00742 |      | TRANS |              | 4878 3   | 3.9E-09           | 1.66        | 4.2% | 4878 3   | 1412 | 3.9E-01 | 0.41  | 3.6E-08 | 1.34  | 2171 |            |      |       |         |  |  |
| 104 | rs139504202        | chr10:110097410 |              | Insulin like growth factor binding protein 1                  | P08833 |      | TRANS |              | 2771 35  | 9.2E-09           | -2.72       | 3.8% | 2771 35  | 1382 | 4.1E-01 | -0.21 | 5.0E-04 | -0.79 | 2141 |            |      |       |         |  |  |
| 105 | 7:57407593:TTCC    | chr7:57407593   |              | Hemojuvelin                                                   | Q6ZVN8 |      | TRANS |              | 3332 57  | 2.6E-09           | 0.35        | 4.3% | 3332 57  | 1362 | 4.5E-01 | -0.03 | 4.6E-03 | 0.10  | 2121 |            |      |       |         |  |  |
| 106 | rs1439411          | chr4:161340537  |              | interleukin 17 receptor B                                     | Q9NRM6 |      | TRANS |              | 5084 154 | 1.9E-08           | -0.55       | 3.8% | 5084 154 | 1416 | 4.5E-01 | 0.06  | 3.2E-03 | -0.18 | 2175 |            |      |       |         |  |  |
| 107 | rs116932673        | chr20:49328985  | PAR6B        | Dickkopf like protein 1                                       | Q9UK85 |      | TRANS |              | 3644 5   | 4.0E-08           | -2.13       | 3.6% | 3644 5   | 1346 | 4.8E-01 | -0.11 | 7.1E-03 | -0.39 | 2105 |            |      |       |         |  |  |
| 108 | rs138414818        | chr21:38962028  | KCNJ6        |                                                               |        |      |       |              |          |                   |             |      |          |      |         |       |         |       |      |            |      |       |         |  |  |

|     |                  |                 |         |                                                 |        |      |       |              |         |         |       |      |         |      |         |       |         |       |      |  |  |  |  |  |
|-----|------------------|-----------------|---------|-------------------------------------------------|--------|------|-------|--------------|---------|---------|-------|------|---------|------|---------|-------|---------|-------|------|--|--|--|--|--|
| 114 | rs1558500        | chr4:55482077   |         | <i>Cathepsin D</i>                              | P07339 |      | TRANS |              | 3180 46 | 2.0E-08 | -0.73 | 3.9% | 5508-62 | 1421 | 8.5E-01 | -0.02 | 5.1E-04 | -0.27 | 2180 |  |  |  |  |  |
| 115 | rs71544591       | chr7:158188449  | PTPRN2  | <i>Serotransferrin</i>                          | P02787 |      | TRANS |              | 4162 54 | 6.4E-09 | 1.34  | 4.0% | 4162 54 | 1270 | 8.9E-01 | 0.02  | 6.1E-03 | 0.28  | 2029 |  |  |  |  |  |
| 116 | rs138015312      | chr4:69512847   | UGT2B15 | <i>Neurogenic locus notch homolog protein 1</i> | P46531 |      | TRANS |              | 5107 7  | 3.9E-08 | 2.13  | 3.6% | 5107 7  | 651  | 8.9E-01 | -0.01 | 5.8E-01 | 0.03  | 1410 |  |  |  |  |  |
| 117 | rs10905367       | chr10:8472876   |         | <i>Contactin 5</i>                              | O94779 |      | TRANS |              | 3299 29 | 3.8E-08 | -0.30 | 3.5% | 3299 29 | 1394 | 9.0E-01 | 0.00  | 2.5E-03 | -0.09 | 2153 |  |  |  |  |  |
| 118 | rs9516774        | chr13:97518070  | HS6ST3  | <i>Complement C2</i>                            | P06681 |      | TRANS |              | 3186 2  | 4.7E-08 | -0.30 | 3.7% | 3186 2  | 1421 | 9.3E-01 | 0.00  | 2.4E-03 | -0.09 | 2180 |  |  |  |  |  |
| 119 | rs56009545       | chr13:106079978 |         | <i>Interleukin 1 Receptor accessory protein</i> | Q9NPH3 |      | TRANS |              | 2630 12 | 4.3E-08 | -0.43 | 3.6% | 2630 12 | 1274 | 9.3E-01 | 0.00  | 1.2E-03 | -0.15 | 2033 |  |  |  |  |  |
| 120 | 8:38324424:ACC_A | chr8:38324424   | FGFR1   | <i>Fibroblast growth factor receptor 1</i>      | P11362 | Same | CIS   | Cognate Gene | 2424 69 | 1.1E-08 | 0.37  | 4.0% | 5532-53 | 1037 | 9.5E-01 | 0.00  | 1.5E-03 | 0.12  | 1796 |  |  |  |  |  |

**Supplemental Table 2. pQTLs identified through GWAS.** Characteristics of the 120 pQTLs identified in the FHS discovery cohort and validated in the MDCS cohort are displayed. Chromosomal locations are based off of assembly GRCh37.p13. Bolded values denote Bonferroni-adjusted significance (FHS Offspring cohort and meta analysis P-value  $\leq 5 \times 10^{-8}$  / 156 tested proteins =  $3.2 \times 10^{-10}$ ; MDCS validation P-value  $\leq 0.05$  / 120 =  $4.1 \times 10^{-4}$ ). Variations in validation sample number in MDCS are due to missingness of genotypes. Values in parentheses reflect genotyping results when SNPs that were imputed from the Affymetrix array were available on the Illumina exome array. A rank order list of pQTLs of particular interest are presented in column A, based on annotations in Column Y, as well as association strength, validation, and heritability parameters. In columns U-X, reported sentinel SNPs (and variants in LD,  $r^2 \geq 0.3$ ) were queried against publicly-available data from three previous studies of human peripheral blood using a similar aptamer-based platform (Supplemental References 1-3). The reported SNP with the lowest P-value is shown. Although SNPs may have been detected in all three studies, all data from Columns U-X are from Supplemental Reference 3, since these had the lowest associated P-values, likely due to the comparatively large size of the study. Abbreviations: MAF: minor allele frequency;  $h^2$ : heritability; beta: estimated beta coefficient; MR: Mendelian Randomization.

| pQTL             |                      | Target Protein Characteristics |                               | FHS Discovery Cohort |                            | MDCS Validation Cohort |                            |      | CARDIoGRAMplusC4D Results |                       |
|------------------|----------------------|--------------------------------|-------------------------------|----------------------|----------------------------|------------------------|----------------------------|------|---------------------------|-----------------------|
|                  |                      |                                |                               |                      |                            |                        |                            |      | Coronary Artery Disease   | Myocardial Infarction |
| Sentinel Variant | Variant Nearest Gene | SOMAmer Target Protein         | Context of Association (<1Mb) | P-Value              | Estimated Beta Coefficient | P-Value                | Estimated Beta Coefficient | N    | P-Value CAD               | P-Value MI            |
| rs2519093        | ABO                  | E Selectin                     | TRANS                         | <b>1.6E-82</b>       | 1.10                       | <b>8.5E-182</b>        | 1.01                       | 1419 | <b>1.2E-11</b>            | <b>3.5E-17</b>        |
| rs41290120       | NECTIN2              | Apolipoprotein E               | CIS                           | <b>2.2E-11</b>       | 1.50                       | <b>4.9E-25</b>         | 1.01                       | 1397 | <b>1.4E-10</b>            | <b>2.6E-09</b>        |
| rs112635299      | SERPINA1             | Alpha 1 antitrypsin            | CIS                           | <b>7.0E-15</b>       | 1.41                       | <b>4.0E-30</b>         | 1.33                       | 1391 | <b>3.9E-04</b>            | 1.9E-03               |
| rs11682107       | IL1F10               | Interleukin 1 receptor type 1  | TRANS                         | <b>4.5E-08</b>       | 0.29                       | 1.5E-03                | 0.12                       | 1318 | 1.8E-03                   | <b>3.4E-05</b>        |

**Supplemental Table 3. Overlap between pQTLs and CVD risk loci.** Characteristics of pQTLs that overlap with risk loci for coronary artery disease (CAD) and myocardial infarction (MI) identified with Bonferroni-adjusted significance ( $P \leq 0.05/120 = 4.2 \times 10^{-4}$ ) in the Coronary Artery Disease Genome-Wide Replication and Meta-Analysis plus the Coronary Artery Disease Genetics (CARDIoGRAMplusC4D) consortium data.

| Exome Array Locus Characteristics |             |                |        |         |                        |          |                  |       | Protein Characteristics                                       |                    |                                        |       |         | FHS Discovery Cohort Correlations |                |       |                | MDCS Validation Cohort |      |                |       |                |
|-----------------------------------|-------------|----------------|--------|---------|------------------------|----------|------------------|-------|---------------------------------------------------------------|--------------------|----------------------------------------|-------|---------|-----------------------------------|----------------|-------|----------------|------------------------|------|----------------|-------|----------------|
| Exome ID                          | SNP ID      | Locus          | Gene   | Ref/Alt | Functional Consequence | Damaging | Loss of Function | MAF   | SOMAmer Target Protein                                        | SOMAmer UniProt ID | SNP/Gene Encoding Protein Relationship |       |         | SOMAmer ID                        | P-Value        | Beta  | h <sup>2</sup> | SOMAmer ID             | N    | P-Value        | Beta  | h <sup>2</sup> |
| exm810762                         | rs61738953  | Chr10:14862082 | CDNF   | C/G     | Non-synonymous variant | TRUE     | FALSE            | 4.9%  | Cerebral dopamine neurotrophic factor                         | Q49AH0             | Same Chr                               | CIS   | Cognate | 4962-52                           | <b>6.7E-20</b> | -1.06 | 21.8%          | 4962-52                | 1421 | <b>8.9E-41</b> | -1.12 | 11.2%          |
| exm533392                         | rs438999    | Chr6:31928306  | SKIV2L | A/G     | Non-synonymous variant | FALSE    | FALSE            | 9.6%  | Complement factor B                                           | P00751             | Same Chr                               | CIS   |         | 4129-72                           | <b>8.6E-17</b> | 0.74  | 11.1%          | 4129-72                | 1421 | <b>1.5E-28</b> | 0.78  | 8.0%           |
| exm1313353                        | rs79254649  | Chr17:34304605 | CCL16  | C/A     | Non-synonymous variant | TRUE     | FALSE            | 1.8%  | C C motif chemokine 16                                        | O15467             | Same Chr                               | CIS   | Cognate | 4913-78                           | <b>9.2E-17</b> | -1.54 | 6.4%           | 4913-78                | 1421 | <b>2.1E-45</b> | -1.58 | 12.1%          |
| exm1553463                        | rs199825459 | Chr20:57572709 | CTSZ   | A/G     | Non-synonymous variant | TRUE     | FALSE            | 0.5%  | Cathepsin Z                                                   | Q9UBR2             | Same Chr                               | CIS   | Cognate | 4971-1                            | <b>3.6E-12</b> | -2.48 | 17.4%          | 4971-1                 | 1421 | <b>1.0E-25</b> | -2.43 | 6.9%           |
| exm683975                         | rs41341748  | Chr8:16012594  | MSR1   | G/A     | Stop site variant      | TRUE     | TRUE             | 0.9%  | Galectin 3 binding protein                                    | Q08380             |                                        | TRANS |         | 5000-52                           | <b>2.3E-11</b> | 1.79  | 13.8%          | 5000-52                | 1421 | <b>4.1E-20</b> | 1.85  | 5.6%           |
| exm533579                         | rs45531831  | Chr6:31938120  | DOM3Z  | C/T     | Splice Site variant    | TRUE     | TRUE             | 2.6%  | Complement factor B                                           | P00751             | Same Chr                               | CIS   |         | 4129-72                           | <b>2.1E-09</b> | -0.94 | 6.1%           | 4129-72                | 1421 | <b>1.9E-26</b> | -1.03 | 7.7%           |
| exm687734                         | rs145284541 | Chr8:22049596  | BMP1   | G/A     | Non-synonymous variant | TRUE     | FALSE            | 0.9%  | Endothelial monocyte activating polypeptide 2                 | Q12904             |                                        | TRANS |         | 2714-78                           | <b>2.7E-08</b> | 1.48  | 5.4%           | 2714-78                | 1421 | 6.1E-02        | 0.74  | 0.2%           |
| exm793327                         | rs141547732 | Chr9:136280025 | REXO4  | G/A     | Non-synonymous variant | FALSE    | FALSE            | 1.1%  | Cadherin 5                                                    | P33151             |                                        | TRANS |         | 2819-23                           | <b>4.7E-08</b> | 1.40  | 2.9%           | 2819-23                | 1421 | 2.1E-02        | 0.69  | 0.8%           |
| exm533508                         | rs106287    | Chr6:31935750  | SKIV2L | G/A     | Non-synonymous variant | TRUE     | FALSE            | 3.6%  | Complement factor B                                           | P00751             | Same Chr                               | CIS   |         | 4129-72                           | <b>5.1E-08</b> | 0.76  | 3.1%           | 4129-72                | 1421 | <b>5.4E-06</b> | 0.61  | 1.4%           |
| exm847175                         | rs143647630 | Chr10:99531284 | SFRP5  | C/T     | Non-synonymous variant | TRUE     | FALSE            | 1.0%  | C C motif chemokine 18                                        | P55774             |                                        | TRANS |         | 3044-3                            | <b>5.8E-08</b> | 1.43  | 11.8%          | 3044-3                 | 1421 | 8.8E-01        | -0.04 | 0.0%           |
| exm534819                         | rs2070600   | Chr6:32151443  | AGER   | C/T     | Non-synonymous variant | TRUE     | FALSE            | 4.9%  | Advanced glycosylation end product specific receptor, soluble | Q15109             | Same Chr                               | CIS   | Cognate | 4125-52                           | <b>1.3E-07</b> | -0.64 | 8.4%           | 4125-52                | 1421 | <b>3.2E-14</b> | -0.66 | 4.1%           |
| exm1403864                        | rs1128392   | Chr19:2344022  | SPPL2B | G/A     | Non-synonymous variant | FALSE    | FALSE            | 4.6%  | Hepatocyte growth factor receptor                             | P08581             |                                        | TRANS |         | 2837-3                            | <b>2.4E-07</b> | 0.64  | 8.8%           | 2837-3                 | 1421 | 7.9E-01        | -0.02 | 0.0%           |
| exm1414617                        | rs2230199   | Chr19:6718387  | C3     | G/C     | Non-synonymous variant | FALSE    | FALSE            | 20.5% | Complement C3b                                                | P01024             | Same Chr                               | CIS   | Cognate | 4480-59                           | <b>3.6E-07</b> | -0.32 | 5.2%           | 4480-59                | 1421 | 4.6E-03        | -0.14 | 0.6%           |

**Supplemental Table 4. pQTLs identified through exome array single variant analysis.** Characteristics of the 13 pQTLs identified in the FHS discovery cohort that met a Bonferroni-adjusted level of significance ( $P\text{-value} \leq 0.05/81,021 \text{ variants tested} = 6.2 \times 10^{-7}$ ). Variants that validated with Bonferroni-adjusted levels of significance in MDCS are shown in bold ( $P \leq 0.05 / 13 = 3.8 \times 10^{-3}$ ). Chromosomal locations are based off of assembly GRCh37.p13. Abbreviations: MAF: minor allele frequency; beta: estimated beta coefficient.

| Exome Array Burden Analysis | Protein Characteristics                                       |                        |                    |                                     |                               | FHS Discovery Cohort Results          |                |         | MDCS Validation Cohort Results |            |                |         |
|-----------------------------|---------------------------------------------------------------|------------------------|--------------------|-------------------------------------|-------------------------------|---------------------------------------|----------------|---------|--------------------------------|------------|----------------|---------|
|                             | Gene                                                          | SOMAmer Target Protein | SOMAmer UniProt ID | Context of Association (Chromosome) | Context of Association (<1Mb) | Context of Association (Closest Gene) | SOMAmer ID     | P-Value | Beta                           | SOMAmer ID | N              | P-Value |
| AKR1A1                      | Alcohol dehydrogenase [NADP(+)]                               | P14550                 | Same Chr           | CIS                                 | Cognate                       | 4192-10                               | <b>3.4E-41</b> | -1.57   | 4192-10                        | 1421       | <b>1.8E-73</b> | -1.22   |
| FCN2                        | Ficolin 2                                                     | Q15485                 | Same Chr           | CIS                                 | Cognate                       | 3313-21                               | <b>3.2E-31</b> | -0.87   | 3313-21                        | 1421       | <b>1.0E-54</b> | -0.91   |
| APOE                        | Apolipoprotein E (isoform E2)                                 | P02649                 | Same Chr           | CIS                                 | Cognate                       | 5312-49                               | <b>1.1E-28</b> | -1.12   | 5312-49                        | 1421       | <b>8.5E-31</b> | -0.85   |
| APOE                        | Endothelial monocyte activating polypeptide 2                 | Q12904                 |                    | TRANS                               |                               | 2714-78                               | <b>8.3E-21</b> | 0.91    | 2714-78                        | 1421       | <b>2.9E-78</b> | 1.38    |
| APOE                        | Apolipoprotein E (isoform E3)                                 | P02649                 | Same Chr           | CIS                                 | Cognate                       | 2937-10                               | <b>1.7E-20</b> | -0.94   | 2937-10                        | 1421       | <b>1.6E-33</b> | -0.89   |
| SERPINA1                    | Alpha 1 antitrypsin                                           | P01009                 | Same Chr           | CIS                                 | Cognate                       | 3580-25                               | <b>2.0E-20</b> | -1.53   | 3580-25                        | 1421       | <b>7.5E-11</b> | -0.62   |
| CDNF                        | Cerebral dopamine neurotrophic factor                         | Q49AH0                 | Same Chr           | CIS                                 | Cognate                       | 4962-52                               | <b>6.7E-20</b> | -1.06   | 4962-52                        | 1421       | <b>8.3E-36</b> | -1.11   |
| APOE                        | Apolipoprotein E                                              | P02649                 | Same Chr           | CIS                                 | Cognate                       | 2418-55                               | <b>4.4E-19</b> | -0.91   | 2418-55                        | 1421       | <b>3.1E-36</b> | -0.93   |
| APOE                        | Apolipoprotein E (isoform E4)                                 | P02649                 | Same Chr           | CIS                                 | Cognate                       | 2938-55                               | <b>6.8E-19</b> | -0.90   | 2938-55                        | 1421       | <b>8.3E-27</b> | -0.79   |
| CCL16                       | C C motif chemokine 16                                        | O15467                 | Same Chr           | CIS                                 | Cognate                       | 4913-78                               | <b>9.2E-17</b> | -1.54   | 4913-78                        | 1421       | <b>5.8E-40</b> | -1.59   |
| CTSZ                        | Cathepsin Z                                                   | Q9UBR2                 | Same Chr           | CIS                                 | Cognate                       | 4971-1                                | <b>3.6E-12</b> | -2.48   | 4971-1                         | 1421       | <b>6.6E-20</b> | -1.84   |
| CFB                         | Complement factor B                                           | P00751                 | Same Chr           | CIS                                 | Cognate                       | 4129-72                               | <b>5.4E-11</b> | -0.47   | 4129-72                        | 1421       | <b>3.1E-18</b> | -0.46   |
| CERS2                       | Cathepsin S                                                   | P25774                 | Same Chr           | CIS                                 |                               | 3181-50                               | <b>7.9E-11</b> | -0.42   | 3181-50                        | 1421       | <b>6.9E-24</b> | -0.47   |
| BNIP1                       | Cathepsin S                                                   | P25774                 | Same Chr           | CIS                                 |                               | 3181-50                               | <b>2.8E-10</b> | -0.41   | 3181-50                        | 1421       | <b>4.9E-11</b> | -0.29   |
| DOM3Z                       | Complement factor B                                           | P00751                 | Same Chr           | CIS                                 |                               | 4129-72                               | <b>6.6E-10</b> | -0.91   | 4129-72                        | 1421       | <b>7.0E-17</b> | -0.71   |
| SURF6                       | Cadherin 5                                                    | P33151                 |                    | TRANS                               |                               | 2819-23                               | <b>2.5E-09</b> | 0.32    | 2819-23                        | 1421       | <b>6.8E-09</b> | 0.23    |
| GABPB2                      | Cathepsin S                                                   | P25774                 | Same Chr           | CIS                                 |                               | 3181-50                               | <b>2.0E-08</b> | -0.50   | 3181-50                        | 1421       | <b>3.8E-19</b> | -0.58   |
| AGER                        | Advanced glycosylation end product specific receptor, soluble | Q15109                 | Same Chr           | CIS                                 | Cognate                       | 4125-52                               | <b>2.9E-07</b> | -0.57   | 4125-52                        | 1421       | <b>2.3E-10</b> | -0.51   |
| CAD                         | Glypican 3                                                    | P51654                 |                    | TRANS                               |                               | 4842-62                               | <b>6.0E-07</b> | -0.83   | 4842-62                        | 1421       | 8.9E-01        | -0.02   |
| SFRP5                       | C C motif chemokine 18                                        | P55774                 |                    | TRANS                               |                               | 3044-3                                | <b>8.6E-07</b> | 1.25    | 3044-3                         | 1421       | 3.8E-01        | 0.20    |
| MYOM3                       | Netrin receptor UNC5D                                         | Q6UXZ4                 |                    | TRANS                               |                               | 5140-56                               | <b>1.3E-06</b> | -0.23   | 5140-56                        | 1421       | 3.7E-01        | -0.03   |
| BMP1                        | Endothelial monocyte activating polypeptide 2                 | Q12904                 |                    | TRANS                               |                               | 2714-78                               | <b>1.4E-06</b> | 1.11    | 2714-78                        | 1421       | 5.9E-01        | 0.13    |
| SAT2                        | Tumor necrosis factor receptor superfamily member 17          | Q02223                 |                    | TRANS                               |                               | 2665-26                               | <b>1.4E-06</b> | -0.48   | 2665-26                        | 1421       | 2.7E-01        | 0.07    |
| AP2A2                       | Lymphocyte antigen 86                                         | O95711                 |                    | TRANS                               |                               | 3623-84                               | <b>1.5E-06</b> | 2.30    | 3623-84                        | 1421       | 6.5E-02        | -0.82   |



|         |                                                               |        |  |       |  |         |                |       |         |      |                |       |
|---------|---------------------------------------------------------------|--------|--|-------|--|---------|----------------|-------|---------|------|----------------|-------|
| FUT8    | Advanced glycosylation end product specific receptor, soluble | Q15109 |  | TRANS |  | 4125-52 | <b>2.2E-06</b> | -0.28 | 4125-52 | 1421 | <b>1.5E-05</b> | -0.19 |
| SLC39A2 | Cystatin M                                                    | Q15828 |  | TRANS |  | 3303-23 | <b>2.2E-06</b> | 1.01  | 3303-23 | 1421 | 5.4E-01        | -0.09 |
| SEC24C  | Iduronate 2 sulfatase                                         | P22304 |  | TRANS |  | 3198-4  | <b>2.2E-06</b> | -0.67 | 3198-4  | 1421 | 8.8E-01        | -0.02 |
| RRP36   | Cystatin SA                                                   | P09228 |  | TRANS |  | 4324-33 | <b>3.0E-06</b> | 1.48  | 4324-33 | 1421 | 8.7E-01        | 0.06  |

**Supplemental Table 5. pQTLs identified through exome array gene-based burden testing.** Characteristics of the 28 pQTLs identified in the FHS discovery cohort using gene-based burden testing that reached a Bonferroni-adjusted level of statistical significance ( $P \leq 0.05/13,008$  genes tested =  $3.8 \times 10^{-6}$ ). pQTLs that validated in MDCS with Bonferroni-adjusted significance are bolded ( $P \leq 0.05 / 28 = 1.8 \times 10^{-3}$ ). Abbreviations: Beta: estimated beta coefficient.

| Locus Characteristics |                              |         |              |              |                               | FHS Discovery Cohort Results |          |                            |                                          |                                  |
|-----------------------|------------------------------|---------|--------------|--------------|-------------------------------|------------------------------|----------|----------------------------|------------------------------------------|----------------------------------|
| Variant               | Variant Chromosomal Location | Ref/Alt | Variant Type | Closest Gene | Genes Within 60kb             | SOMAmer Reagent              | P-Value  | Estimated Beta Coefficient | Estimated Heritability (h <sup>2</sup> ) | Observed Effect Allele Frequency |
| rs740750              | 5:149515074                  | G/A     | SNP          | PDGFRB       | CDX1;CSF1R;PDGFRB;SLC6A7      | 3459-49                      | 3.0e-316 | 1.16                       | 65.6%                                    | 52.2%                            |
| rs2304058             | 5:149508544                  | C/G     | SNP          | PDGFRB       | CDX1;CSF1R;PDGFRB             | 3459-49                      | 7.2e-310 | 1.15                       | 65.1%                                    | 52.1%                            |
| rs3816018             | 5:149508475                  | C/T     | SNP          | PDGFRB       | CDX1;CSF1R;PDGFRB             | 3459-49                      | 9.0e-310 | 1.15                       | 65.0%                                    | 52.1%                            |
| rs2240781             | 5:149516480                  | C/T     | SNP          | PDGFRB       | CDX1;CSF1R;PDGFRB;SLC6A7      | 3459-49                      | 1.8E-307 | 1.17                       | 64.9%                                    | 52.3%                            |
| rs2240780             | 5:149513072                  | A/G     | SNP          | PDGFRB       | CDX1;CSF1R;PDGFRB;SLC6A7      | 3459-49                      | 2.9E-278 | 1.12                       | 62.6%                                    | 53.8%                            |
| rs4705415             | 5:149517235                  | A/G     | SNP          | PDGFRB       | CDX1;CSF1R;PDGFRB;SLC6A7      | 3459-49                      | 5.3E-196 | -1.06                      | 54.0%                                    | 54.8%                            |
| rs11748255            | 5:149512042                  | A/G     | SNP          | PDGFRB       | CDX1;CSF1R;PDGFRB;SLC6A7      | 3459-49                      | 2.0E-195 | -1.06                      | 54.0%                                    | 55.0%                            |
| rs1864972             | 5:149509270                  | A/G     | SNP          | PDGFRB       | CDX1;CSF1R;PDGFRB             | 3459-49                      | 2.2E-109 | 0.93                       | 39.4%                                    | 61.1%                            |
| rs1864971             | 5:149509111                  | C/T     | SNP          | PDGFRB       | CDX1;CSF1R;PDGFRB             | 3459-49                      | 2.5E-109 | 0.93                       | 39.4%                                    | 61.1%                            |
| NA                    | 5:149519259                  | I/R     | Insertion    | PDGFRB       | CDX1;CSF1R;PDGFRB;SLC6A7      | 3459-49                      | 9.1E-109 | 0.96                       | 39.3%                                    | 66.6%                            |
| NA                    | 5:149519261                  | I/R     | Insertion    | PDGFRB       | CDX1;CSF1R;PDGFRB;SLC6A7      | 3459-49                      | 1.0E-108 | 0.96                       | 39.3%                                    | 66.6%                            |
| NA                    | 5:149519258                  | D/R     | Deletion     | PDGFRB       | CDX1;CSF1R;PDGFRB;SLC6A7      | 3459-49                      | 9.9E-107 | 0.96                       | 38.8%                                    | 67.2%                            |
| rs740751              | 5:149515888                  | T/C     | SNP          | PDGFRB       | CDX1;CSF1R;PDGFRB;SLC6A7      | 3459-49                      | 3.0E-106 | 0.93                       | 38.7%                                    | 62.1%                            |
| rs3776081             | 5:149532107                  | C/T     | SNP          | PDGFRB       | CDX1;CSF1R;PDGFRB;SLC6A7      | 3459-49                      | 8.3E-97  | 0.93                       | 36.5%                                    | 66.4%                            |
| rs3756312             | 5:149537194                  | G/A     | SNP          | PDGFRB       | CDX1;CSF1R;PDGFRB;SLC6A7      | 3459-49                      | 4.0E-92  | 0.94                       | 35.3%                                    | 66.7%                            |
| rs3776075             | 5:149518824                  | G/T     | SNP          | PDGFRB       | CDX1;CSF1R;PDGFRB;SLC6A7      | 3459-49                      | 1.2E-74  | 0.83                       | 30.6%                                    | 60.9%                            |
| rs3776078             | 5:149524179                  | G/C     | SNP          | PDGFRB       | CDX1;CSF1R;PDGFRB;SLC6A7      | 3459-49                      | 3.2E-69  | 0.78                       | 28.9%                                    | 61.4%                            |
| rs919751              | 5:149505489                  | G/A     | SNP          | PDGFRB       | CDX1;CSF1R;PDGFRB             | 3459-49                      | 1.7E-67  | -0.79                      | 28.4%                                    | 61.7%                            |
| rs10069910            | 5:149525169                  | C/T     | SNP          | PDGFRB       | CDX1;CSF1R;PDGFRB;SLC6A7      | 3459-49                      | 4.9E-66  | 0.78                       | 28.0%                                    | 61.5%                            |
| rs3756311             | 5:149537080                  | G/A     | SNP          | PDGFRB       | CDX1;CSF1R;PDGFRB;SLC6A7      | 3459-49                      | 1.9E-65  | 0.82                       | 27.8%                                    | 60.8%                            |
| rs9324641             | 5:149527844                  | C/T     | SNP          | PDGFRB       | CDX1;CSF1R;PDGFRB;SLC6A7      | 3459-49                      | 1.9E-65  | 0.76                       | 27.8%                                    | 61.3%                            |
| rs4583877             | 5:149531801                  | T/C     | SNP          | PDGFRB       | CDX1;CSF1R;PDGFRB;SLC6A7      | 3459-49                      | 3.8E-65  | 0.78                       | 27.7%                                    | 61.3%                            |
| rs3776079             | 5:149528319                  | A/G     | SNP          | PDGFRB       | CDX1;CSF1R;PDGFRB;SLC6A7      | 3459-49                      | 6.4E-64  | 0.76                       | 27.3%                                    | 61.7%                            |
| rs3828610             | 5:149535625                  | C/A     | SNP          | PDGFRB       | CDX1;CSF1R;PDGFRB;SLC6A7      | 3459-49                      | 4.6E-62  | 0.78                       | 26.7%                                    | 61.3%                            |
| rs2304061             | 5:149503670                  | A/G     | SNP          | PDGFRB       | CDX1;CSF1R;PDGFRB             | 3459-49                      | 2.0E-55  | 0.86                       | 24.5%                                    | 75.3%                            |
| rs246391              | 5:149497177                  | C/T     | SNP          | PDGFRB       | CDX1;CSF1R;PDGFRB             | 3459-49                      | 2.2E-40  | 0.67                       | 18.9%                                    | 56.0%                            |
| rs246396              | 5:149512678                  | C/T     | SNP          | PDGFRB       | CDX1;CSF1R;PDGFRB;SLC6A7      | 3459-49                      | 4.8E-40  | 0.94                       | 18.8%                                    | 82.3%                            |
| rs246388              | 5:149495395                  | C/T     | SNP          | PDGFRB       | CDX1;CSF1R;PDGFRB             | 3459-49                      | 4.8E-40  | 0.67                       | 18.8%                                    | 56.1%                            |
| rs2229562             | 5:149495253                  | C/T     | SNP          | PDGFRB       | CDX1;CSF1R;PDGFRB             | 3459-49                      | 5.6E-40  | 0.67                       | 18.8%                                    | 56.1%                            |
| rs246394              | 5:149498151                  | A/G     | SNP          | PDGFRB       | CDX1;CSF1R;PDGFRB             | 3459-49                      | 1.0E-39  | 0.72                       | 18.6%                                    | 70.7%                            |
| rs246389              | 5:149496003                  | T/A     | SNP          | PDGFRB       | CDX1;CSF1R;PDGFRB             | 3459-49                      | 1.3E-38  | 0.67                       | 18.2%                                    | 56.8%                            |
| rs11747083            | 5:149541826                  | C/T     | SNP          | CDX1         | MK2A;CDX1;CSF1R;PDGFRB;SLC6A7 | 3459-49                      | 5.0E-38  | 1.26                       | 18.0%                                    | 78.2%                            |
| rs12515782            | 5:149519421                  | C/T     | SNP          | PDGFRB       | CDX1;CSF1R;PDGFRB;SLC6A7      | 3459-49                      | 6.8E-38  | 0.75                       | 17.9%                                    | 77.4%                            |
| rs11167495            | 5:149520580                  | C/T     | SNP          | PDGFRB       | CDX1;CSF1R;PDGFRB;SLC6A7      | 3459-49                      | 8.4E-38  | 0.74                       | 17.9%                                    | 77.4%                            |
| rs12523235            | 5:149519151                  | T/C     | SNP          | PDGFRB       | CDX1;CSF1R;PDGFRB;SLC6A7      | 3459-49                      | 1.4E-37  | 0.74                       | 17.8%                                    | 77.5%                            |
| rs11738390            | 5:149520206                  | T/G     | SNP          | PDGFRB       | CDX1;CSF1R;PDGFRB;SLC6A7      | 3459-49                      | 2.7E-37  | 0.74                       | 17.7%                                    | 77.5%                            |
| rs11738308            | 5:149520092                  | T/C     | SNP          | PDGFRB       | CDX1;CSF1R;PDGFRB;SLC6A7      | 3459-49                      | 9.1E-37  | 0.74                       | 17.5%                                    | 77.3%                            |
| rs2304060             | 5:149501751                  | C/A     | SNP          | PDGFRB       | CDX1;CSF1R;PDGFRB             | 3459-49                      | 3.0E-35  | 0.61                       | 16.8%                                    | 54.2%                            |
| rs13171150            | 5:149523176                  | T/C     | SNP          | PDGFRB       | CDX1;CSF1R;PDGFRB;SLC6A7      | 3459-49                      | 1.9E-34  | 0.71                       | 16.5%                                    | 78.1%                            |
| rs7720799             | 5:149523777                  | T/C     | SNP          | PDGFRB       | CDX1;CSF1R;PDGFRB;SLC6A7      | 3459-49                      | 2.2E-34  | 0.71                       | 16.5%                                    | 78.1%                            |
| rs55915827            | 5:149521791                  | G/A     | SNP          | PDGFRB       | CDX1;CSF1R;PDGFRB;SLC6A7      | 3459-49                      | 4.3E-34  | 0.98                       | 16.3%                                    | 89.4%                            |
| rs10063714            | 5:149522627                  | A/T     | SNP          | PDGFRB       | CDX1;CSF1R;PDGFRB;SLC6A7      | 3459-49                      | 4.5E-34  | 0.98                       | 16.3%                                    | 89.4%                            |
| rs10066011            | 5:149523776                  | C/T     | SNP          | PDGFRB       | CDX1;CSF1R;PDGFRB;SLC6A7      | 3459-49                      | 7.2E-34  | 0.97                       | 16.2%                                    | 89.4%                            |
| rs72832182            | 5:149520435                  | T/C     | SNP          | PDGFRB       | CDX1;CSF1R;PDGFRB;SLC6A7      | 3459-49                      | 7.7E-34  | 0.96                       | 16.2%                                    | 89.3%                            |
| rs3776076             | 5:149520970                  | G/A     | SNP          | PDGFRB       | CDX1;CSF1R;PDGFRB;SLC6A7      | 3459-49                      | 8.4E-34  | 0.96                       | 16.2%                                    | 89.3%                            |
| rs67069374            | 5:149521256                  | C/G     | SNP          | PDGFRB       | CDX1;CSF1R;PDGFRB;SLC6A7      | 3459-49                      | 8.5E-34  | 0.96                       | 16.2%                                    | 89.3%                            |
| rs10062000            | 5:149525189                  | A/G     | SNP          | PDGFRB       | CDX1;CSF1R;PDGFRB;SLC6A7      | 3459-49                      | 9.1E-34  | 0.97                       | 16.2%                                    | 88.8%                            |
| rs6874642             | 5:149492296                  | T/C     | SNP          | CSF1R        | CDX1;CSF1R;HMGXB3;PDGFRB      | 3459-49                      | 2.4E-33  | -0.83                      | 16.0%                                    | 78.1%                            |
| rs4358508             | 5:149531832                  | G/A     | SNP          | PDGFRB       | CDX1;CSF1R;PDGFRB;SLC6A7      | 3459-49                      | 5.0E-33  | 0.93                       | 15.9%                                    | 88.5%                            |
| rs7736526             | 5:149489242                  | T/C     | SNP          | CSF1R        | CDX1;CSF1R;HMGXB3;PDGFRB      | 3459-49                      | 8.5E-33  | 0.66                       | 15.8%                                    | 68.7%                            |

**Supplemental Table 6.** Representative GWAS data for PDGFRB. Characteristics of variant-protein associations for platelet derived growth factor receptor beta (SOMAmer 3459-49). This table has been abbreviated to include the top 50 variant-protein associations for ease of review. All associations with a P-value  $\leq 1 \times 10^{-3}$  are available on dbGaP.

| Locus Characteristics |                              |         |              |              |                   | FHS Discovery Cohort Results |          |                            |                                          |                                  |
|-----------------------|------------------------------|---------|--------------|--------------|-------------------|------------------------------|----------|----------------------------|------------------------------------------|----------------------------------|
| Variant               | Variant Chromosomal Location | Ref/Alt | Variant Type | Closest Gene | Genes Within 60kb | SOMAmer Reagent              | P-Value  | Estimated Beta Coefficient | Estimated Heritability (h <sup>2</sup> ) | Observed Effect Allele Frequency |
| rs6787861             | 3:190352527                  | A/C     | SNP          | IL1RAP       | IL1RAP            | 2630-12                      | 1.8E-162 | -1.37                      | 46.8%                                    | 83.1%                            |
| rs1024948             | 3:190347681                  | C/T     | SNP          | IL1RAP       | IL1RAP            | 2630-12                      | 4.3E-159 | -1.34                      | 46.3%                                    | 85.7%                            |
| NA                    | 3:190348185                  | R/D     | Deletion     | IL1RAP       | IL1RAP            | 2630-12                      | 4.3E-159 | -1.34                      | 46.3%                                    | 85.7%                            |
| rs1058843             | 3:190347989                  | A/C     | SNP          | IL1RAP       | IL1RAP            | 2630-12                      | 4.3E-159 | -1.34                      | 46.3%                                    | 85.7%                            |
| rs7642607             | 3:190348298                  | G/A     | SNP          | IL1RAP       | IL1RAP            | 2630-12                      | 4.3E-159 | -1.34                      | 46.3%                                    | 85.7%                            |
| rs1024947             | 3:190347678                  | C/G     | SNP          | IL1RAP       | IL1RAP            | 2630-12                      | 4.3E-159 | -1.34                      | 46.3%                                    | 85.7%                            |
| rs7642797             | 3:190348515                  | G/A     | SNP          | IL1RAP       | IL1RAP            | 2630-12                      | 4.3E-159 | -1.34                      | 46.3%                                    | 85.7%                            |
| rs7611887             | 3:190347391                  | C/T     | SNP          | IL1RAP       | IL1RAP            | 2630-12                      | 4.4E-159 | -1.34                      | 46.3%                                    | 85.7%                            |
| rs1024944             | 3:190346723                  | G/A     | SNP          | IL1RAP       | IL1RAP            | 2630-12                      | 4.5E-159 | -1.34                      | 46.2%                                    | 85.7%                            |
| rs1024942             | 3:190346667                  | G/A     | SNP          | IL1RAP       | IL1RAP            | 2630-12                      | 4.5E-159 | -1.34                      | 46.2%                                    | 85.7%                            |
| rs1024941             | 3:190346658                  | T/A     | SNP          | IL1RAP       | IL1RAP            | 2630-12                      | 4.6E-159 | -1.34                      | 46.2%                                    | 85.7%                            |
| rs2361837             | 3:190346525                  | A/G     | SNP          | IL1RAP       | IL1RAP            | 2630-12                      | 4.6E-159 | -1.34                      | 46.2%                                    | 85.7%                            |
| rs2885373             | 3:190346468                  | T/C     | SNP          | IL1RAP       | IL1RAP            | 2630-12                      | 4.7E-159 | -1.34                      | 46.2%                                    | 85.7%                            |
| rs6444445             | 3:190346357                  | G/A     | SNP          | IL1RAP       | IL1RAP            | 2630-12                      | 4.7E-159 | -1.34                      | 46.2%                                    | 85.7%                            |
| rs6444444             | 3:190346231                  | A/G     | SNP          | IL1RAP       | IL1RAP            | 2630-12                      | 4.8E-159 | -1.34                      | 46.2%                                    | 85.7%                            |
| rs6444443             | 3:190346218                  | G/A     | SNP          | IL1RAP       | IL1RAP            | 2630-12                      | 4.8E-159 | -1.34                      | 46.2%                                    | 85.7%                            |
| rs6444442             | 3:190346060                  | A/G     | SNP          | IL1RAP       | IL1RAP            | 2630-12                      | 4.8E-159 | -1.34                      | 46.2%                                    | 85.7%                            |
| rs724609              | 3:190349078                  | G/A     | SNP          | IL1RAP       | IL1RAP            | 2630-12                      | 5.0E-159 | -1.34                      | 46.2%                                    | 85.7%                            |
| rs4686558             | 3:190349888                  | A/G     | SNP          | IL1RAP       | IL1RAP            | 2630-12                      | 5.9E-159 | -1.34                      | 46.2%                                    | 85.7%                            |
| rs1024943             | 3:190346702                  | T/C     | SNP          | IL1RAP       | IL1RAP            | 2630-12                      | 6.0E-159 | -1.34                      | 46.2%                                    | 85.6%                            |
| rs4543060             | 3:190354410                  | C/A     | SNP          | IL1RAP       | IL1RAP            | 2630-12                      | 1.0E-157 | -1.36                      | 46.0%                                    | 85.5%                            |
| rs724608              | 3:190348810                  | A/G     | SNP          | IL1RAP       | IL1RAP            | 2630-12                      | 3.3E-157 | -1.34                      | 46.0%                                    | 84.8%                            |
| rs11927365            | 3:190344128                  | G/A     | SNP          | IL1RAP       | IL1RAP            | 2630-12                      | 3.7E-155 | -1.35                      | 45.7%                                    | 85.6%                            |
| rs2361835             | 3:190344900                  | G/A     | SNP          | IL1RAP       | IL1RAP            | 2630-12                      | 8.4E-155 | -1.33                      | 45.6%                                    | 85.4%                            |
| rs2885372             | 3:190344871                  | C/T     | SNP          | IL1RAP       | IL1RAP            | 2630-12                      | 8.4E-155 | -1.33                      | 45.6%                                    | 85.4%                            |
| rs9813227             | 3:190340177                  | A/C     | SNP          | IL1RAP       | IL1RAP            | 2630-12                      | 1.2E-108 | -1.15                      | 37.2%                                    | 83.8%                            |
| rs2161060             | 3:190334615                  | C/T     | SNP          | IL1RAP       | IL1RAP            | 2630-12                      | 7.4E-105 | -1.13                      | 36.4%                                    | 83.8%                            |
| rs6793294             | 3:190328872                  | A/G     | SNP          | IL1RAP       | IL1RAP            | 2630-12                      | 1.9E-100 | -1.11                      | 35.4%                                    | 83.7%                            |
| rs6444438             | 3:190314871                  | C/T     | SNP          | IL1RAP       | IL1RAP            | 2630-12                      | 2.2E-93  | -1.07                      | 33.8%                                    | 83.6%                            |
| rs6444437             | 3:190314270                  | C/T     | SNP          | IL1RAP       | IL1RAP            | 2630-12                      | 2.7E-93  | -1.07                      | 33.8%                                    | 83.6%                            |
| rs6444436             | 3:190313582                  | C/T     | SNP          | IL1RAP       | IL1RAP            | 2630-12                      | 2.9E-93  | -1.07                      | 33.8%                                    | 83.6%                            |
| rs2193872             | 3:190313267                  | T/C     | SNP          | IL1RAP       | IL1RAP            | 2630-12                      | 1.9E-92  | -1.06                      | 33.6%                                    | 83.6%                            |
| rs6763761             | 3:190352514                  | G/T     | SNP          | IL1RAP       | IL1RAP            | 2630-12                      | 2.0E-90  | -1.16                      | 33.1%                                    | 74.4%                            |
| rs4624606             | 3:190354246                  | A/T     | SNP          | IL1RAP       | IL1RAP            | 2630-12                      | 2.3E-61  | -0.81                      | 25.1%                                    | 75.2%                            |
| rs7642899             | 3:190312715                  | C/G     | SNP          | IL1RAP       | IL1RAP            | 2630-12                      | 3.7E-59  | -0.84                      | 24.4%                                    | 78.3%                            |
| rs3773956             | 3:190311066                  | G/A     | SNP          | IL1RAP       | IL1RAP            | 2630-12                      | 7.6E-59  | -0.84                      | 24.3%                                    | 78.3%                            |
| rs6767500             | 3:190310701                  | A/C     | SNP          | IL1RAP       | IL1RAP            | 2630-12                      | 9.3E-59  | -0.84                      | 24.3%                                    | 78.2%                            |
| rs3773957             | 3:190310671                  | A/T     | SNP          | IL1RAP       | IL1RAP            | 2630-12                      | 1.0E-58  | -0.84                      | 24.3%                                    | 78.2%                            |
| NA                    | 3:190350871                  | R/D     | Deletion     | IL1RAP       | IL1RAP            | 2630-12                      | 6.1E-58  | -0.77                      | 24.0%                                    | 72.3%                            |
| rs7628250             | 3:190308527                  | G/A     | SNP          | IL1RAP       | IL1RAP            | 2630-12                      | 1.6E-57  | -0.83                      | 23.9%                                    | 78.1%                            |
| rs2361836             | 3:190344922                  | T/C     | SNP          | IL1RAP       | IL1RAP            | 2630-12                      | 1.6E-56  | -0.76                      | 23.6%                                    | 72.2%                            |
| rs13071108            | 3:190355651                  | C/T     | SNP          | IL1RAP       | IL1RAP            | 2630-12                      | 8.4E-56  | -1.20                      | 23.3%                                    | 71.7%                            |
| rs10049319            | 3:190333699                  | T/C     | SNP          | IL1RAP       | IL1RAP            | 2630-12                      | 6.0E-48  | -0.72                      | 20.7%                                    | 70.7%                            |
| rs10049469            | 3:190333548                  | A/G     | SNP          | IL1RAP       | IL1RAP            | 2630-12                      | 6.1E-48  | -0.72                      | 20.7%                                    | 70.7%                            |
| rs16865696            | 3:190333462                  | G/C     | SNP          | IL1RAP       | IL1RAP            | 2630-12                      | 6.1E-48  | -0.72                      | 20.7%                                    | 70.7%                            |
| rs34581855            | 3:190333322                  | A/G     | SNP          | IL1RAP       | IL1RAP            | 2630-12                      | 6.1E-48  | -0.72                      | 20.7%                                    | 70.7%                            |
| NA                    | 3:190333162                  | R/D     | Deletion     | IL1RAP       | IL1RAP            | 2630-12                      | 6.2E-48  | -0.72                      | 20.7%                                    | 70.7%                            |
| rs4140710             | 3:190332685                  | C/T     | SNP          | IL1RAP       | IL1RAP            | 2630-12                      | 6.4E-48  | -0.72                      | 20.7%                                    | 70.7%                            |
| rs4140711             | 3:190332654                  | C/T     | SNP          | IL1RAP       | IL1RAP            | 2630-12                      | 6.5E-48  | -0.72                      | 20.7%                                    | 70.7%                            |
| NA                    | 3:190330977                  | R/D     | Deletion     | IL1RAP       | IL1RAP            | 2630-12                      | 7.8E-48  | -0.72                      | 20.6%                                    | 70.7%                            |

**Supplemental Table 7.** Representative GWAS data for IL1RAP. Characteristics of variant-protein associations for interleukin-1 receptor accessory protein (SOMAmer 2630-12). This table has been abbreviated to include the top 50 variant-protein associations for ease of review. All associations with a P-value  $\leq 1 \times 10^{-3}$  are available on dbGaP.

| Locus Characteristics |                              |         |              |              |                    | FHS Discovery Cohort Results |          |                            |                                          |                                  |
|-----------------------|------------------------------|---------|--------------|--------------|--------------------|------------------------------|----------|----------------------------|------------------------------------------|----------------------------------|
| Variant               | Variant Chromosomal Location | Ref/Alt | Variant Type | Closest Gene | Genes Within 60kb  | SOMAmer Reagent              | P-Value  | Estimated Beta Coefficient | Estimated Heritability (h <sup>2</sup> ) | Observed Effect Allele Frequency |
| rs11653614            | 17:77703751                  | A/G     | SNP          | ENPP7        | CBX2;ENPP7;MIR4739 | 4435-66                      | 1.8E-107 | -0.97                      | 38.4%                                    | 64.6%                            |
| rs8072274             | 17:77701601                  | C/A     | SNP          | ENPP7        | CBX2;ENPP7;MIR4739 | 4435-66                      | 1.8E-107 | -0.95                      | 38.4%                                    | 64.3%                            |
| rs8072313             | 17:77699041                  | A/G     | SNP          | ENPP7        | CBX2;ENPP7;MIR4739 | 4435-66                      | 2.0E-107 | -0.94                      | 38.4%                                    | 64.1%                            |
| rs9908122             | 17:77699607                  | C/G     | SNP          | ENPP7        | CBX2;ENPP7;MIR4739 | 4435-66                      | 2.0E-107 | -0.94                      | 38.4%                                    | 64.1%                            |
| rs6565475             | 17:77702346                  | T/C     | SNP          | ENPP7        | CBX2;ENPP7;MIR4739 | 4435-66                      | 2.2E-107 | -0.96                      | 38.4%                                    | 64.3%                            |
| rs8064811             | 17:77701450                  | A/G     | SNP          | ENPP7        | CBX2;ENPP7;MIR4739 | 4435-66                      | 2.2E-107 | -0.95                      | 38.4%                                    | 64.3%                            |
| rs4383181             | 17:77698814                  | T/C     | SNP          | ENPP7        | CBX2;ENPP7;MIR4739 | 4435-66                      | 2.7E-107 | -0.93                      | 38.4%                                    | 64.3%                            |
| rs4497729             | 17:77698701                  | A/G     | SNP          | ENPP7        | CBX2;ENPP7;MIR4739 | 4435-66                      | 2.8E-107 | -0.93                      | 38.4%                                    | 64.3%                            |
| rs35759773            | 17:77698649                  | T/A     | SNP          | ENPP7        | CBX2;ENPP7;MIR4739 | 4435-66                      | 2.8E-107 | -0.93                      | 38.4%                                    | 64.3%                            |
| NA                    | 17:77698638                  | I/R     | Insertion    | ENPP7        | CBX2;ENPP7;MIR4739 | 4435-66                      | 2.9E-107 | -0.93                      | 38.4%                                    | 64.3%                            |
| rs4313839             | 17:77698619                  | C/T     | SNP          | ENPP7        | CBX2;ENPP7;MIR4739 | 4435-66                      | 3.1E-107 | -0.93                      | 38.4%                                    | 64.3%                            |
| rs9910429             | 17:77703172                  | G/A     | SNP          | ENPP7        | CBX2;ENPP7;MIR4739 | 4435-66                      | 3.2E-107 | -0.96                      | 38.4%                                    | 64.4%                            |
| rs11653577            | 17:77703608                  | C/G     | SNP          | ENPP7        | CBX2;ENPP7;MIR4739 | 4435-66                      | 3.3E-107 | -0.96                      | 38.4%                                    | 64.4%                            |
| rs6565474             | 17:77702132                  | C/G     | SNP          | ENPP7        | CBX2;ENPP7;MIR4739 | 4435-66                      | 3.8E-107 | -0.96                      | 38.3%                                    | 64.4%                            |
| rs11657411            | 17:77703822                  | T/C     | SNP          | ENPP7        | CBX2;ENPP7;MIR4739 | 4435-66                      | 4.6E-107 | -0.97                      | 38.3%                                    | 64.1%                            |
| rs28682546            | 17:77704179                  | C/T     | SNP          | ENPP7        | CBX2;ENPP7;MIR4739 | 4435-66                      | 4.9E-107 | -0.96                      | 38.3%                                    | 64.4%                            |
| rs4627392             | 17:77698001                  | T/G     | SNP          | ENPP7        | CBX2;ENPP7;MIR4739 | 4435-66                      | 3.1E-106 | -0.98                      | 38.1%                                    | 64.3%                            |
| rs28689126            | 17:77704220                  | C/G     | SNP          | ENPP7        | CBX2;ENPP7;MIR4739 | 4435-66                      | 3.7E-106 | -0.97                      | 38.1%                                    | 64.7%                            |
| rs28502318            | 17:77704251                  | C/G     | SNP          | ENPP7        | CBX2;ENPP7;MIR4739 | 4435-66                      | 3.8E-106 | -0.97                      | 38.1%                                    | 64.7%                            |
| rs8074728             | 17:77705045                  | C/T     | SNP          | ENPP7        | CBX2;ENPP7;MIR4739 | 4435-66                      | 3.8E-106 | -0.98                      | 38.1%                                    | 63.8%                            |
| rs8076533             | 17:77704314                  | T/C     | SNP          | ENPP7        | CBX2;ENPP7;MIR4739 | 4435-66                      | 4.0E-106 | -0.97                      | 38.1%                                    | 64.7%                            |
| rs8074547             | 17:77704912                  | C/T     | SNP          | ENPP7        | CBX2;ENPP7;MIR4739 | 4435-66                      | 4.5E-106 | -0.98                      | 38.1%                                    | 64.1%                            |
| rs4442854             | 17:77698224                  | T/C     | SNP          | ENPP7        | CBX2;ENPP7;MIR4739 | 4435-66                      | 4.6E-106 | -0.98                      | 38.1%                                    | 64.3%                            |
| rs8067469             | 17:77698322                  | A/G     | SNP          | ENPP7        | CBX2;ENPP7;MIR4739 | 4435-66                      | 4.7E-106 | -0.97                      | 38.1%                                    | 64.4%                            |
| rs8071194             | 17:77698458                  | C/A     | SNP          | ENPP7        | CBX2;ENPP7;MIR4739 | 4435-66                      | 4.7E-106 | -0.96                      | 38.1%                                    | 64.2%                            |
| rs4474726             | 17:77698088                  | C/T     | SNP          | ENPP7        | CBX2;ENPP7;MIR4739 | 4435-66                      | 4.8E-106 | -0.98                      | 38.1%                                    | 64.3%                            |
| rs4496195             | 17:77698114                  | C/G     | SNP          | ENPP7        | CBX2;ENPP7;MIR4739 | 4435-66                      | 4.9E-106 | -0.98                      | 38.1%                                    | 64.3%                            |
| rs4313838             | 17:77698582                  | C/T     | SNP          | ENPP7        | CBX2;ENPP7;MIR4739 | 4435-66                      | 5.5E-106 | -0.93                      | 38.1%                                    | 64.5%                            |
| rs62077883            | 17:77705542                  | C/A     | SNP          | ENPP7        | CBX2;ENPP7;MIR4739 | 4435-66                      | 8.5E-106 | -0.97                      | 38.0%                                    | 64.8%                            |
| rs140493810           | 17:77705932                  | G/A     | SNP          | ENPP7        | CBX2;ENPP7;MIR4739 | 4435-66                      | 4.9E-104 | -1.22                      | 37.6%                                    | 70.7%                            |
| NA                    | 17:77705953                  | D/R     | Deletion     | ENPP7        | CBX2;ENPP7;MIR4739 | 4435-66                      | 1.7E-103 | -0.98                      | 37.5%                                    | 64.8%                            |
| rs11868696            | 17:77706406                  | G/A     | SNP          | ENPP7        | CBX2;ENPP7;MIR4739 | 4435-66                      | 3.7E-103 | -0.98                      | 37.4%                                    | 64.6%                            |
| rs8077074             | 17:77697392                  | T/C     | SNP          | ENPP7        | CBX2;ENPP7;MIR4739 | 4435-66                      | 4.0E-103 | -1.07                      | 37.4%                                    | 67.3%                            |
| rs8065292             | 17:77697097                  | G/A     | SNP          | ENPP7        | CBX2;ENPP7;MIR4739 | 4435-66                      | 4.0E-103 | -1.10                      | 37.4%                                    | 67.3%                            |
| rs11871061            | 17:77706544                  | C/T     | SNP          | ENPP7        | CBX2;ENPP7;MIR4739 | 4435-66                      | 5.0E-103 | -0.97                      | 37.4%                                    | 64.8%                            |
| rs35948345            | 17:77697427                  | A/G     | SNP          | ENPP7        | CBX2;ENPP7;MIR4739 | 4435-66                      | 2.9E-101 | 5.41                       | 37.0%                                    | 88.6%                            |
| rs4889994             | 17:77694616                  | C/T     | SNP          | ENPP7        | CBX2;ENPP7;MIR4739 | 4435-66                      | 2.3E-100 | -2.13                      | 36.8%                                    | 68.6%                            |
| rs11867997            | 17:77695676                  | T/C     | SNP          | ENPP7        | CBX2;ENPP7;MIR4739 | 4435-66                      | 1.8E-99  | -1.62                      | 36.6%                                    | 77.9%                            |
| rs146801384           | 17:77705921                  | C/T     | SNP          | ENPP7        | CBX2;ENPP7;MIR4739 | 4435-66                      | 9.3E-99  | -1.56                      | 36.4%                                    | 77.0%                            |
| NA                    | 17:77696809                  | D/R     | Deletion     | ENPP7        | CBX2;ENPP7;MIR4739 | 4435-66                      | 1.7E-97  | -1.85                      | 36.1%                                    | 81.0%                            |
| rs35246623            | 17:77695987                  | T/C     | SNP          | ENPP7        | CBX2;ENPP7;MIR4739 | 4435-66                      | 4.1E-97  | -1.84                      | 36.0%                                    | 81.2%                            |
| rs35979434            | 17:77696836                  | A/G     | SNP          | ENPP7        | CBX2;ENPP7;MIR4739 | 4435-66                      | 4.2E-97  | -1.82                      | 36.0%                                    | 81.2%                            |
| rs3923265             | 17:77707120                  | G/A     | SNP          | ENPP7        | CBX2;ENPP7;MIR4739 | 4435-66                      | 4.7E-97  | -0.97                      | 36.0%                                    | 63.2%                            |
| rs34110129            | 17:77698142                  | T/C     | SNP          | ENPP7        | CBX2;ENPP7;MIR4739 | 4435-66                      | 1.0E-96  | -1.70                      | 35.9%                                    | 81.0%                            |
| NA                    | 17:77702681                  | D/R     | Deletion     | ENPP7        | CBX2;ENPP7;MIR4739 | 4435-66                      | 2.7E-96  | -1.63                      | 35.8%                                    | 81.0%                            |
| rs62077882            | 17:77704482                  | T/C     | SNP          | ENPP7        | CBX2;ENPP7;MIR4739 | 4435-66                      | 2.2E-95  | -1.63                      | 35.6%                                    | 81.0%                            |
| rs9916601             | 17:77707018                  | T/C     | SNP          | ENPP7        | CBX2;ENPP7;MIR4739 | 4435-66                      | 3.2E-95  | -1.01                      | 35.6%                                    | 67.5%                            |
| NA                    | 17:77705335                  | I/R     | Insertion    | ENPP7        | CBX2;ENPP7;MIR4739 | 4435-66                      | 2.1E-91  | -1.03                      | 34.6%                                    | 69.7%                            |
| rs34231971            | 17:77704697                  | A/G     | SNP          | ENPP7        | CBX2;ENPP7;MIR4739 | 4435-66                      | 8.7E-91  | -1.02                      | 34.5%                                    | 69.1%                            |
| rs112460278           | 17:77705742                  | T/C     | SNP          | ENPP7        | CBX2;ENPP7;MIR4739 | 4435-66                      | 2.5E-89  | -2.34                      | 34.1%                                    | 87.4%                            |

**Supplemental Table 8.** Representative GWAS Data for ENPP7. Characteristics of variant-protein associations for ectonucleotide pyrophosphatase/phosphodiesterase family member 7 (SOMAmer 4435-66). This table has been abbreviated to include the top 50 variant-protein associations for ease of review. All associations with a P-value  $\leq 1 \times 10^{-3}$  are available on dbGaP.

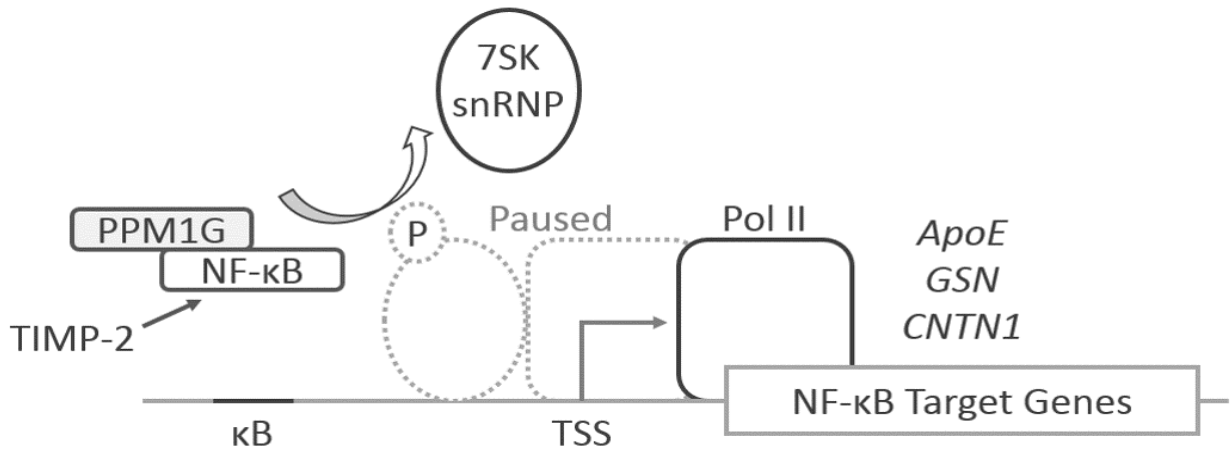

**Supplemental Figure 1. Pathway enrichment analysis suggests common mechanism underlying the pleiotropic effects of PPM1G.** Bioinformatics observations may suggest a model by which PPM1G is recruited to nuclear factor kappa-light-chain-enhancer of activated B cells (NF-κB) target gene promoters to release 7SK snRNP-mediated transcriptional inhibition of DNA polymerase II (Pol II) and allow for expression of NF-κB target genes such as apolipoprotein E (ApoE), gelsolin (GSN), and contactin-1 (CNTN1). Metalloproteinase inhibitor 2 (TIMP-2) is known to be a strong activator of NF-κB transcriptional activity.

**Prevalent Diabetes**

| Protein                                      | SNP        | OR (95% CI)       |
|----------------------------------------------|------------|-------------------|
| AH receptor-interacting protein              | rs13469    | 0.66 (0.37, 1.18) |
| Alcohol dehydrogenase [NADP(+)]              | rs72688441 | 1.09 (0.63, 1.88) |
| C-C motif chemokine 16                       | rs10445391 | 0.89 (0.58, 1.38) |
| E-Selectin                                   | rs2519093  | 0.89 (0.58, 1.38) |
| ENPP7                                        | rs11653614 | 1.41 (0.94, 2.11) |
| Extracellular matrix protein 1               | rs11582423 | 1.03 (0.64, 1.67) |
| Interleukin-1 Receptor accessory protein     | rs6787861  | 0.70 (0.45, 1.08) |
| Interleukin-18 receptor 1                    | rs2041740  | 1.07 (0.62, 1.86) |
| Kynureninase                                 | rs35647509 | 2.17 (1.06, 4.45) |
| Melanoma-derived growth regulatory protein   | rs3869574  | 1.07 (0.65, 1.77) |
| Platelet-derived growth factor receptor beta | rs740750   | 0.98 (0.71, 1.35) |

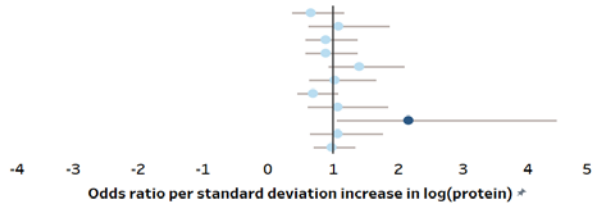

**Circulating Total Cholesterol Levels**

| Protein                                      | SNP        | ES (95% CI)          |
|----------------------------------------------|------------|----------------------|
| AH receptor-interacting protein              | rs13469    | 0.18 (0.04, 0.33)    |
| Alcohol dehydrogenase [NADP(+)]              | rs72688441 | -0.06 (-0.20, 0.09)  |
| C-C motif chemokine 16                       | rs10445391 | 0.00 (-0.12, 0.13)   |
| E-Selectin                                   | rs2519093  | -0.13 (-0.25, -0.01) |
| ENPP7                                        | rs11653614 | -0.01 (-0.12, 0.10)  |
| Extracellular matrix protein 1               | rs11582423 | 0.04 (-0.08, 0.17)   |
| Interleukin-1 Receptor accessory protein     | rs6787861  | -0.04 (-0.14, 0.05)  |
| Interleukin-18 receptor 1                    | rs2041740  | -0.09 (-0.24, 0.05)  |
| Kynureninase                                 | rs35647509 | 0.09 (-0.07, 0.25)   |
| Melanoma-derived growth regulatory protein   | rs3869574  | -0.03 (-0.16, 0.10)  |
| Platelet-derived growth factor receptor beta | rs740750   | -0.04 (-0.12, 0.04)  |

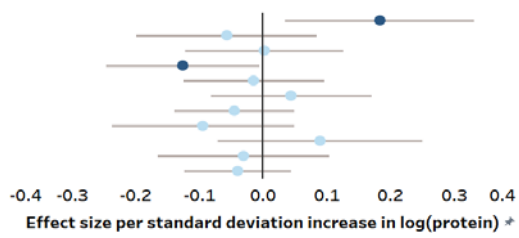

**Circulating HDL Levels**

| Protein                                      | SNP        | ES (95% CI)          |
|----------------------------------------------|------------|----------------------|
| AH receptor-interacting protein              | rs13469    | -0.17 (-0.31, -0.03) |
| Alcohol dehydrogenase [NADP(+)]              | rs72688441 | -0.16 (-0.29, -0.02) |
| C-C motif chemokine 16                       | rs10445391 | 0.02 (-0.10, 0.13)   |
| E-Selectin                                   | rs2519093  | 0.02 (-0.09, 0.14)   |
| ENPP7                                        | rs11653614 | -0.05 (-0.16, 0.05)  |
| Extracellular matrix protein 1               | rs11582423 | -0.04 (-0.16, 0.08)  |
| Interleukin-1 Receptor accessory protein     | rs6787861  | 0.02 (-0.07, 0.11)   |
| Interleukin-18 receptor 1                    | rs2041740  | -0.01 (-0.14, 0.13)  |
| Kynureninase                                 | rs35647509 | 0.07 (-0.09, 0.22)   |
| Melanoma-derived growth regulatory protein   | rs3869574  | -0.03 (-0.16, 0.10)  |
| Platelet-derived growth factor receptor beta | rs740750   | 0.08 (0.00, 0.16)    |

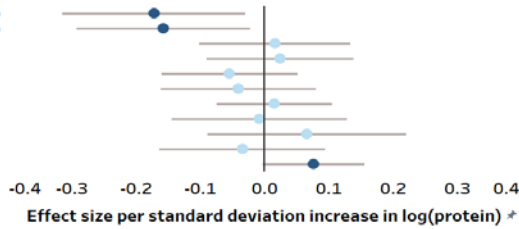

**Systolic Blood Pressure**

| Protein                                      | SNP        | ES (95% CI)         |
|----------------------------------------------|------------|---------------------|
| AH receptor-interacting protein              | rs13469    | 0.16 (0.02, 0.30)   |
| Alcohol dehydrogenase [NADP(+)]              | rs72688441 | 0.03 (-0.11, 0.17)  |
| C-C motif chemokine 16                       | rs10445391 | 0.10 (-0.02, 0.21)  |
| E-Selectin                                   | rs2519093  | 0.03 (-0.09, 0.14)  |
| ENPP7                                        | rs11653614 | 0.00 (-0.11, 0.10)  |
| Extracellular matrix protein 1               | rs11582423 | 0.02 (-0.10, 0.14)  |
| Interleukin-1 Receptor accessory protein     | rs6787861  | -0.03 (-0.12, 0.06) |
| Interleukin-18 receptor 1                    | rs2041740  | -0.13 (-0.27, 0.01) |
| Kynureninase                                 | rs35647509 | 0.04 (-0.12, 0.19)  |
| Melanoma-derived growth regulatory protein   | rs3869574  | 0.05 (-0.08, 0.18)  |
| Platelet-derived growth factor receptor beta | rs740750   | -0.08 (-0.16, 0.00) |

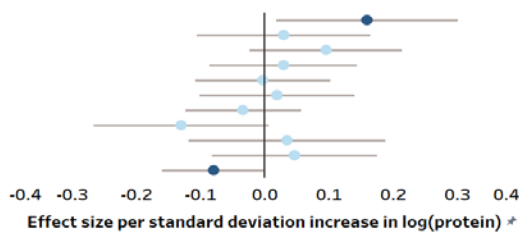

**Framingham Risk Score**

| Protein                                      | SNP        | ES (95% CI)         |
|----------------------------------------------|------------|---------------------|
| AH receptor-interacting protein              | rs13469    | 0.12 (-0.03, 0.27)  |
| Alcohol dehydrogenase [NADP(+)]              | rs72688441 | 0.11 (-0.03, 0.25)  |
| C-C motif chemokine 16                       | rs10445391 | 0.02 (-0.11, 0.14)  |
| E-Selectin                                   | rs2519093  | 0.00 (-0.12, 0.12)  |
| ENPP7                                        | rs11653614 | 0.04 (-0.07, 0.15)  |
| Extracellular matrix protein 1               | rs11582423 | -0.04 (-0.17, 0.08) |
| Interleukin-1 Receptor accessory protein     | rs6787861  | -0.08 (-0.17, 0.02) |
| Interleukin-18 receptor 1                    | rs2041740  | -0.10 (-0.24, 0.04) |
| Kynureninase                                 | rs35647509 | 0.14 (-0.02, 0.29)  |
| Melanoma-derived growth regulatory protein   | rs3869574  | 0.03 (-0.10, 0.17)  |
| Platelet-derived growth factor receptor beta | rs740750   | -0.07 (-0.15, 0.01) |

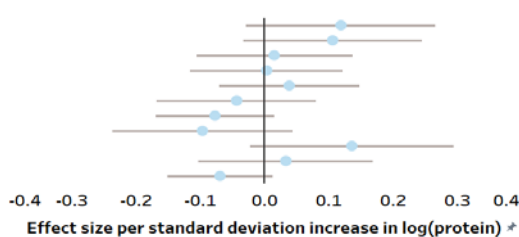

**Supplemental Figure 2. Exploratory Mendelian randomization analyses.** Mendelian randomization (MR) was used to test the causal association of circulating proteins (left column) to selected clinical phenotypes using the sentinel SNP of each pQTLs as an instrumental variable (second column). The effect size (ES, for continuous outcomes) or odds ratio (OR, for binary outcomes) per standard deviation increase in log(protein) with 95% confidence intervals (CI) are displayed as Forest plots. Analyses that suggest a causal association between protein and phenotype are highlighted in dark blue.

## **Supplemental References**

- 1) Lourdusamy A, Newhouse S, Lunnon K, Proitsi P, Powell J, Hodges A, Nelson SK, Stewart A, Williams S, Kloszewska I, Mecocci P, Soininen H, Tsolaki M, Vellas B, Lovestone S, Dobson R, Consortium A and Initiative AsDN. Identification of cis-regulatory variation influencing protein abundance levels in human plasma. *Hum Mol Genet.* 2012;21:3719-26.
- 2) Di Narzo AF, Telesco SE, Brodmerkel C, Argmann C, Peters LA, Li K, Kidd B, Dudley J, Cho J, Schadt EE, Kasarskis A, Dobrin R and Hao K. High-Throughput Characterization of Blood Serum Proteomics of IBD Patients with Respect to Aging and Genetic Factors. *PLoS Genet.* 2017;13:e1006565.
- 3) Suhre K, Arnold M, Bhagwat AM, Cotton RJ, Engelke R, Raffler J, Sarwath H, Thareja G, Wahl A, DeLisle RK, Gold L, Pezer M, Lauc G, El-Din Selim MA, Mook-Kanamori DO, Al-Dous EK, Mohamoud YA, Malek J, Strauch K, Grallert H, Peters A, Kastenmüller G, Gieger C and Graumann J. Connecting genetic risk to disease end points through the human blood plasma proteome. *Nat Commun.* 2017;8:14357
